# Supplementary material for: Numerical model derived intensity-duration thresholds for early warning of rainfall-induced debris flows in the Himalayas
Source: Copernicus journal article supplement (doi:10.5194/nhess-2022-297), 2023-01-13
Supplement: Supplementary file 5 [file nhess-2022-297-supplement.zip]

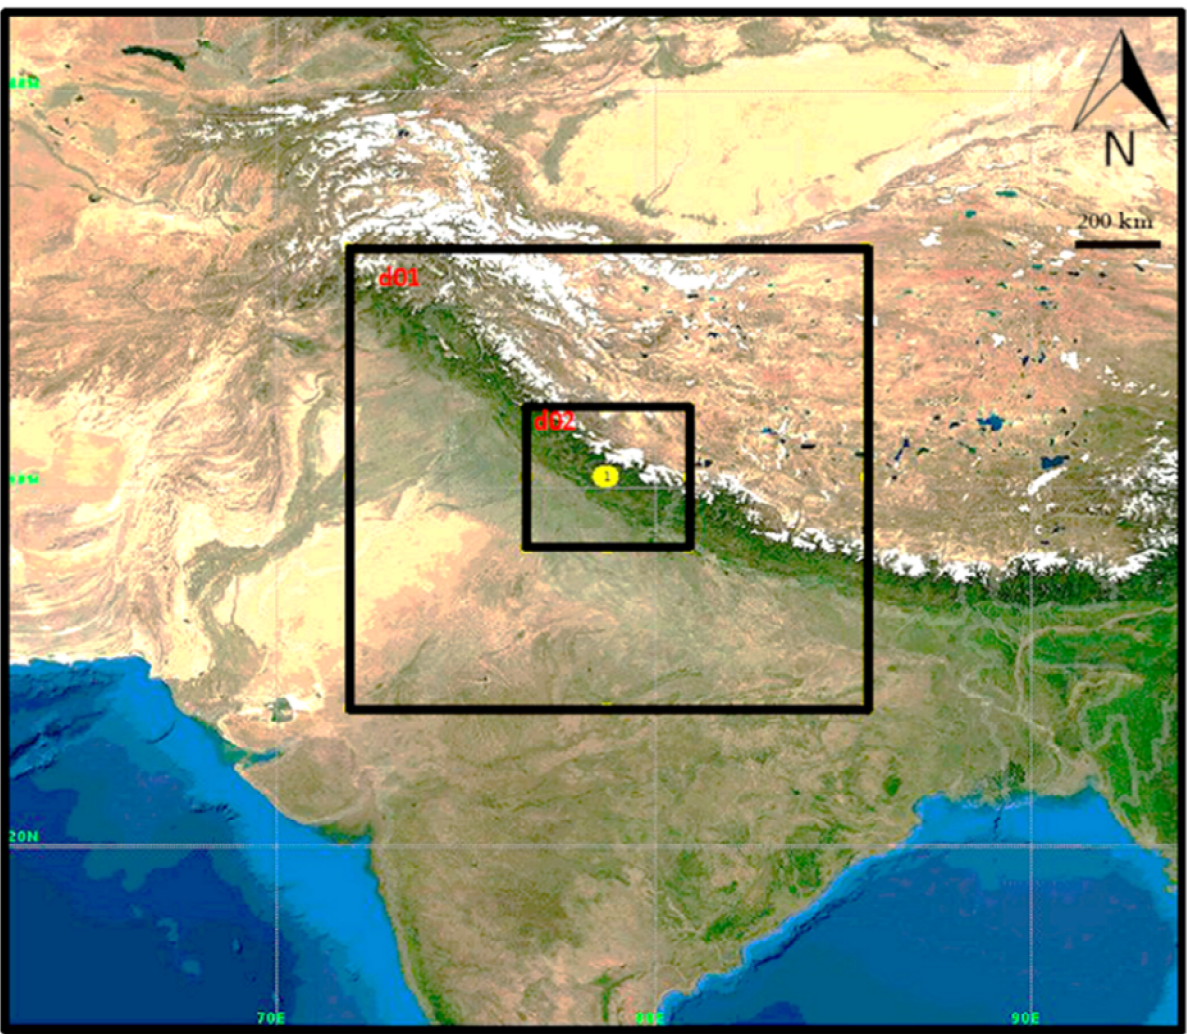

The two nested domains, namely domain d01 (9 km × 9 km) and domain d02 (1.8 km × 1.8 km) for WRF model simulations are shown with black rectangular boxes

| Parameter                          | Description                                          |
|------------------------------------|------------------------------------------------------|
| Initial and boundary data          | ERA5 reanalysis                                      |
| Temporal interval of boundary data | 6 h                                                  |
| Grid size                          | Domain 1: (146*151) * 50<br>Domain 2: (226*231) * 50 |
| Horizontal resolution              | Domain 1: 9 km<br>Domain 2: 1.8 km                   |
| Nesting                            | One way                                              |
| Vertical levels                    | 50                                                   |
| Time step                          | 15 s                                                 |
| Land Use and Land Cover            | USGS data updates using AWiFS                        |
| Topographic data                   | GMTED2010                                            |
| Microphysics                       | Thompson scheme                                      |
| PBL scheme                         | YSU scheme                                           |
| Cumulus parameterization           | Kain-Fritsch scheme                                  |
| Shortwave radiation                | Dudhia scheme                                        |
| Longwave radiation                 | RRTM scheme                                          |
| Land surface model                 | Noah-MP land surface model                           |
| Surface-layer                      | Revised MM5 scheme                                   |
