# Supplementary material for: Numerical model derived intensity-duration thresholds for early warning of rainfall-induced debris flows in the Himalayas
Source: Copernicus journal article supplement (doi:10.5194/nhess-2022-297), 2023-01-13
Supplement: Supplementary file [file nhess-2022-297-AC2-supplement.pdf]

## NHESS

Ref: NHESS-2022-297

### Title: Numerical model derived intensity-duration thresholds for early warning of rainfall-induced debris flows in the Himalayas

#### Response to Referee #2

| Ref. | Comment                                                                                                                                                                                                                                                                                                                                                                                                                                                                                                                                                                                                                                                                                                                                                                                                                                                                                                                                                                                                                                                                                                                                                                                                                                                                                                                                                                                                                                                                                                                                                                                                                                                                                                                                                                                                             | Reply                                                                                                                                                                                                                                                                                                                                                                                                                                                                                                                                                                                                                                                                                                                                         |
|------|---------------------------------------------------------------------------------------------------------------------------------------------------------------------------------------------------------------------------------------------------------------------------------------------------------------------------------------------------------------------------------------------------------------------------------------------------------------------------------------------------------------------------------------------------------------------------------------------------------------------------------------------------------------------------------------------------------------------------------------------------------------------------------------------------------------------------------------------------------------------------------------------------------------------------------------------------------------------------------------------------------------------------------------------------------------------------------------------------------------------------------------------------------------------------------------------------------------------------------------------------------------------------------------------------------------------------------------------------------------------------------------------------------------------------------------------------------------------------------------------------------------------------------------------------------------------------------------------------------------------------------------------------------------------------------------------------------------------------------------------------------------------------------------------------------------------|-----------------------------------------------------------------------------------------------------------------------------------------------------------------------------------------------------------------------------------------------------------------------------------------------------------------------------------------------------------------------------------------------------------------------------------------------------------------------------------------------------------------------------------------------------------------------------------------------------------------------------------------------------------------------------------------------------------------------------------------------|
| 1    | <p><b>General comments</b></p> <p>Thank you for the opportunity to provide a peer review for this manuscript titled “Numerical model derived intensity-duration thresholds for early warning of rainfall-induced debris flows in the Himalayas” (nhess-2022-297). This study uses the Weather Research and Forecasting (WRF) model to estimate hourly rainfall time series at four meteorological station locations near the Kedarnath catchment, Uttarakhand, India, which record daily rainfall totals, during a debris flow event that occurred in June, 2013. A previous study mapped 120 debris flows resulting from this event in the catchment. This study estimates the volume of debris flows during the 2013 event from this inventory with an empirical relationship originally developed for Taiwan. The authors then use this estimated volume, along with an averaged precipitation time series across the four stations, to calibrate a numerical debris flow initiation and runout model for this event. With the calibrated model, the authors simulated cumulative debris flow volume with time as a function of average rainfall intensity for a range of intensity scenarios. The authors plot the time to initiate a debris flow against the average rainfall intensity in these scenarios to define an I-D threshold for the Kedarnath catchment.</p> <p>While the idea to use a weather forecasting model coupled with a numerical debris flow model for landslide early warning in regions without available hourly rainfall data is intriguing and within the scientific scope of NHESS, this study will need serious and substantial modifications to both the analysis and manuscript before it can be considered for publication in NHESS or any other journal. At this stage, this</p> | <p>Thank you for your careful consideration and very detailed evaluation of our manuscript.</p> <p>We sincerely appreciate your time to provide constructive as well as critical comments on the manuscript, analysis, technical aspects and writing of this research article.</p> <p>We thank your encouragement towards the intriguing idea of this manuscript and identifying it within the scientific scope of NHESS.</p> <p>The authors agree this study need serious and substantial modifications in the analysis and manuscript to meet the standards for publication in NHESS and willing to perform the revisions thoroughly.</p> <p>Please see our detailed responses below to each of your comments sectionized in the order.</p> |

|  |                                                                                                                                                                                                                    |  |
|--|--------------------------------------------------------------------------------------------------------------------------------------------------------------------------------------------------------------------|--|
|  | <p>manuscript does not meet the standards for publication in NHESS.</p> <p>I summarize my main comments on the manuscript and the analysis here, and then provide more specific comments in the next sections.</p> |  |
|--|--------------------------------------------------------------------------------------------------------------------------------------------------------------------------------------------------------------------|--|

Comments on Manuscript:

| Ref. | Comment                                                                                                                                                                                                                                                                                                                                                                       | Reply                                                                                                                                                                                                                                                                                                                                 |
|------|-------------------------------------------------------------------------------------------------------------------------------------------------------------------------------------------------------------------------------------------------------------------------------------------------------------------------------------------------------------------------------|---------------------------------------------------------------------------------------------------------------------------------------------------------------------------------------------------------------------------------------------------------------------------------------------------------------------------------------|
| 1    | The abstract makes various statements that are not supported by references or analysis in the main text and does not report the key results. The abstract suggests that the estimated I-D threshold will be used in a LEWS, but this is not validated or sufficiently discussed in the main text.                                                                             | <p>Thank you for pointing the lack in the abstract writing. We add more citation wherever necessary and make the sentences relevant to the key results reported in the manuscript.</p> <p>Following your suggestion, we discuss in detail the usage of I-D threshold method in a LEWS in the main text of the revised manuscript.</p> |
| 2    | The introduction makes numerous incorrect statements, lacks sufficient supporting literature, and does not clearly define a research question or objective.                                                                                                                                                                                                                   | Thanks, we carefully examine for any incorrect statements in the introduction. Thank you for pointing out the lack of clarity in the research question/objective. We address this in the revised manuscript.                                                                                                                          |
| 3    | The methods section does not provide sufficient information to reproduce the analysis or to evaluate the validity of the results. It does not meet basic quality standards, such as defining all parameters. Some key parameters for the debris flow model are reportedly set by "calibration and back analysis," but the details of said calibration are missing altogether. | <p>Thank you for this useful suggestion. We provide detailed information about all the analysis performed.</p> <p>Details of the calibration and back analysis are included in the revised version.</p>                                                                                                                               |
| 4    | The results section, which is only 12 lines long, includes methods descriptions and does not describe the key results of the study                                                                                                                                                                                                                                            | Thank you again. We extend the results section detailing every aspect of the research describing the key results and move the method description to the methodology section.                                                                                                                                                          |
| 5    | The discussion section does not discuss the results of the study or their implications. While it points to some limitations of the analysis, it importantly fails to evaluate the usefulness of the identified threshold for early warning, as suggested in the title.                                                                                                        | Thank you very much for pointing this flaw. We improve the discussion section to evaluate the usefulness of the identified threshold for early warning.                                                                                                                                                                               |
| 6    | The conclusions section repeats introductory and methods material, but does not reach substantial conclusions based on the study's results.                                                                                                                                                                                                                                   | Thanks, we agree and revise the conclusion section based on the results obtained from this study.                                                                                                                                                                                                                                     |

Comments on Analysis:

| Ref. | Comment                                                                                                    | Reply                                                                                                                                    |
|------|------------------------------------------------------------------------------------------------------------|------------------------------------------------------------------------------------------------------------------------------------------|
| 1    | This study uses the WRF model to estimate hourly rainfall across the catchment during the 2013 debris flow | Thank you for pointing it out. We totally agree. We do not have any ground-based rainfall measurement in hourly timestep to validate the |

|   |                                                                                                                                                                                                                                                                                                                                                                                                                                                                                                                                                                                                                                                                                                            |                                                                                                                                                                                                                                                                                                                                                                                                                                                                                                                                                                                                                                                                                                                     |
|---|------------------------------------------------------------------------------------------------------------------------------------------------------------------------------------------------------------------------------------------------------------------------------------------------------------------------------------------------------------------------------------------------------------------------------------------------------------------------------------------------------------------------------------------------------------------------------------------------------------------------------------------------------------------------------------------------------------|---------------------------------------------------------------------------------------------------------------------------------------------------------------------------------------------------------------------------------------------------------------------------------------------------------------------------------------------------------------------------------------------------------------------------------------------------------------------------------------------------------------------------------------------------------------------------------------------------------------------------------------------------------------------------------------------------------------------|
|   | <p>event at 1.8 km resolution. However, although daily meteorological station observations are available at four locations near the catchment, there is no validation or analysis of how well the simulated hourly precipitation totals match the daily totals at each station. Such a validation is required, particularly because this study proposes using the WRF model as an approach for areas without hourly data.</p>                                                                                                                                                                                                                                                                              | <p>WRF outputs. However, considering your suggestion here, we validate the cumulative daily rainfall of WRF outputs with available ground-based precipitation datasets from the India Meteorological Department (IMD).</p> <p>In addition, we validate hourly rainfall from the WRF model with spatially and temporally satellite-derived precipitation data.</p>                                                                                                                                                                                                                                                                                                                                                   |
| 2 | <p>Despite running a spatially explicit weather model and a spatially explicit debris flow model, the authors have chosen to drive the debris flow model of the 2013 event using an averaged hourly precipitation time series at four stations with an elevation difference of ~5000 m. I strongly question this choice, as such an elevation difference likely leads to substantial variations in rainfall intensity across the catchment (Destro et al., 2017; Iadanza et al., 2016). I recommend taking advantage of the available spatially explicit WRF rainfall estimates to drive the debris flow model.</p>                                                                                        | <p>Thank you for your useful critique. We also agree and following your recommendation, in the revision we use spatially explicit rainfall timeseries (from WRF) for the time period to drive the debris flow model.</p>                                                                                                                                                                                                                                                                                                                                                                                                                                                                                            |
| 3 | <p>The debris flow model was calibrated using an empirical estimate for debris flow volume during the 2013 event. The baseline volume estimate was made using an empirical equation originally developed for Taiwan, which is of questionable validity in this different setting. Potentially resulting from this or other sparsely documented modeling choices, the debris flow model substantially overpredicts debris flow areas compared to the mapped inventory, but this is not discussed. Meanwhile, an analysis of how well the model could predict debris flow timing during the 2013 event is missing. Such an analysis is crucial for evaluating this model's usefulness for early warning.</p> | <p>Thanks, we agree to both these critiques. First, we validate the area-volume estimation using different empirical equations other than the one used in the first version of the manuscript.</p> <p>We also estimate the accuracy of the debris flow model outputs using True Skill Statistics and Chi-square tests.</p> <p>Regarding the timing of debris flow triggering, we cross check the initiation time from the model with the one reported in the literature. However, different debris flows out of the total 120 might have been triggered in different time for which we do not have the data and the model is not able to simulate them differently. We discuss these in the revised manuscript.</p> |
| 4 | <p>The scenario analysis conducted to determine points for the I-D threshold relies on constant precipitation intensities, which is unrealistic for any rainstorm. The shape of the hyetograph is important for determining whether or not landslides are triggered (D'Odorico et al., 2005), and I therefore question whether a constant precipitation intensity can sufficiently represent triggering rainfall for estimating warning thresholds. A potential alternative approach could be to use a precipitation generator to run a suite of scenarios and use these to</p>                                                                                                                            | <p>Thank you very much for pointing out a lack in our understanding here. To check the shape of the hyetograph, we compare the WRF outputs with satellite derived hourly precipitation.</p> <p>We are not familiar with the use of precipitation generator. However, we will explore the option suggested here.</p>                                                                                                                                                                                                                                                                                                                                                                                                 |

|   |                                                                                                                                                         |                                                                                                                                                                  |
|---|---------------------------------------------------------------------------------------------------------------------------------------------------------|------------------------------------------------------------------------------------------------------------------------------------------------------------------|
|   | investigate triggering thresholds (Thomas et al., 2018).                                                                                                |                                                                                                                                                                  |
| 5 | No uncertainty of the identified I-D threshold is estimated or discussed.                                                                               | Thanks, yes. We perform an uncertainty analysis considering the over or underestimation of rainfall intensity and duration.                                      |
| 6 | Although this threshold is apparently intended for use in a territorial LEWS, there is no validation of this threshold's performance for early warning. | Thank you for your right comment. As the LEWS is in a prototype stage, we are still not in a position to evaluate the threshold's performance for early warning. |

Specific Comments:

| Ref. | Comment                                                                                                                                                                                                                                                                                                                                                                                                                                                                                                                                                                                                                                                                                                                                                                                 | Reply                                                                                                                                                                                                                                                                                                                                                                                                                                                                                                                                                                                                                                                                                                                                                                                                                                                                                                                                                                   |
|------|-----------------------------------------------------------------------------------------------------------------------------------------------------------------------------------------------------------------------------------------------------------------------------------------------------------------------------------------------------------------------------------------------------------------------------------------------------------------------------------------------------------------------------------------------------------------------------------------------------------------------------------------------------------------------------------------------------------------------------------------------------------------------------------------|-------------------------------------------------------------------------------------------------------------------------------------------------------------------------------------------------------------------------------------------------------------------------------------------------------------------------------------------------------------------------------------------------------------------------------------------------------------------------------------------------------------------------------------------------------------------------------------------------------------------------------------------------------------------------------------------------------------------------------------------------------------------------------------------------------------------------------------------------------------------------------------------------------------------------------------------------------------------------|
| 1    | <p><b>Title</b></p> <p>The title is clear, but promises early warning applications, which are not analyzed and barely discussed in the text. Himalayas suggests a broad region, please specify (e.g. "a Himalayan catchment").</p>                                                                                                                                                                                                                                                                                                                                                                                                                                                                                                                                                      | <p>Thank you. We agree and modify the title as <b><i>"Numerical model derived intensity-duration thresholds for early warning of rainfall-induced debris flows in a Himalayan catchment ."</i></b></p>                                                                                                                                                                                                                                                                                                                                                                                                                                                                                                                                                                                                                                                                                                                                                                  |
| 2    | <p><b>Abstract</b></p> <ul style="list-style-type: none"> <li>•Line 2: Many early warning systems at the territorial scale do not use I-D thresholds (Guzzetti et al., 2020; Scheevel et al., 2017; Peruccacci et al., 2017).</li> <li>•Line 3-4: Introduction does not provide evidence for this claim.</li> <li>•Line 5: Specify what the numerical model does. Does it only apply to extreme rainfall? If so, how do you define "extreme"? Not supported in the text.</li> <li>•Line 7: Which input boundary condition? This is not described in the methods.</li> <li>•Line 8: Specify which model.</li> <li>•Line 9: Glossary not mentioned in methods.</li> <li>•Line 11: Use of this threshold in a LEWS is not evaluated or sufficiently discussed in the main text.</li> </ul> | <p>Thanks for the suggestion. Yes, we amend the sentence providing details of LEWS do not use the I-D thresholds.</p> <p>We amend the introduction with evidence to this claim.</p> <p>Thanks for the suggestion. The numerical model simulates erosion/debris flow triggering for any given rainfall intensity and not just for extreme rainfall. We include the definition of extreme rainfall based on IMD glossary. In revision, will include relevant details in the manuscript.</p> <p>Thanks. We include the details of the boundary conditions in the methods clearly.</p> <p>Thanks, we specify the model in the amended version of the manuscript.</p> <p>Glossary explained in the methods in the revised version of the manuscript.</p> <p>Thank you. We briefly explain the LEWS which uses the I-D threshold. However, as the LEWS is in a prototype stage, we are still not in a position to evaluate the threshold's performance for early warning.</p> |
|      |                                                                                                                                                                                                                                                                                                                                                                                                                                                                                                                                                                                                                                                                                                                                                                                         |                                                                                                                                                                                                                                                                                                                                                                                                                                                                                                                                                                                                                                                                                                                                                                                                                                                                                                                                                                         |

|          |                                                                                                                                                                                                                                                                                                                                                                                                                                                                                                                                                                                                                                                                                                                                                                                                                                                                                                                                                                                                                                                                                                                                                                                                              |                                                                                                                                                                                                                                                                                                                                                                                                                                                                                                                                                                                                                                                                                                                                                                                                                                                                                                                                                                                                                                                                                                                                |
|----------|--------------------------------------------------------------------------------------------------------------------------------------------------------------------------------------------------------------------------------------------------------------------------------------------------------------------------------------------------------------------------------------------------------------------------------------------------------------------------------------------------------------------------------------------------------------------------------------------------------------------------------------------------------------------------------------------------------------------------------------------------------------------------------------------------------------------------------------------------------------------------------------------------------------------------------------------------------------------------------------------------------------------------------------------------------------------------------------------------------------------------------------------------------------------------------------------------------------|--------------------------------------------------------------------------------------------------------------------------------------------------------------------------------------------------------------------------------------------------------------------------------------------------------------------------------------------------------------------------------------------------------------------------------------------------------------------------------------------------------------------------------------------------------------------------------------------------------------------------------------------------------------------------------------------------------------------------------------------------------------------------------------------------------------------------------------------------------------------------------------------------------------------------------------------------------------------------------------------------------------------------------------------------------------------------------------------------------------------------------|
| <p>3</p> | <p><b>Introduction</b></p> <ul style="list-style-type: none"> <li>•Line 14: Although the frequency and magnitude of extreme rainfall may be increasing, there is to my knowledge so far no empirical evidence that shows that disastrous debris flows have become more frequent. These citations do not show it. Please adjust wording or include the relevant literature.</li> <li>•Line 17: Debris flow <i>impacts</i>. Non-structural measures do not mitigate debris flows.</li> <li>•Line 19: Adapt to what? Please specify.</li> <li>•Line 20: These cover some regions, but few cover entire nations. Please reword.</li> <li>•Line 21: This statement is incorrect and needs citations. I-D thresholds are rarely estimated using forecasts, but are usually determined using observed rainfall.</li> <li>•Line 24: Needs citations. Consider (Intrieri et al., 2013; Segoni et al., 2018; Stähli et al., 2015) and references therein.</li> <li>•Line 30. This statement appears to be incorrect. Figure 6 of (Mathew et al., 2014) presents an I-D threshold with points with &lt;24 hour durations.</li> <li>•Line 32. This statement needs references.</li> <li>•Line 34. References.</li> </ul> | <p>Thank you for your critical suggestions in the content, writing and presentation of the Introduction.</p> <p>Thanks, we agree to your opinion. We rephrase the wordings and include relevant literature to possible support the inference.</p> <p>Thank you. Yes, non-structural measures do not mitigate debris flows but may hep in reducing the impacts caused by debris flows. We rephrase it accordingly.</p> <p>Adapt to practices for efficient early warning.</p> <p>Thanks, we reword as suggested.</p> <p>Thank you, we agree and correct it accordingly.</p> <p>Thanks for suggesting, we include these citations in the revised manuscript.</p> <p>Thanks, the thresholds used in their study uses 3 hourly rainfalls from TRMM 3B42 V.6 rainfall data. However, the actual LEWS operated by National Remote Sensing Centre (NRSC), Indian Space Research Organisation (ISRO) uses daily as well as multiple days antecedent rainfall based on Mathew et al., (2014). We rephrase as suggested.</p> <p><a href="#">Link to NRSC-ISRO LEWS.</a></p> <p>Thanks, we include references in Line 32 and Line 34.</p> |
| <p>4</p> | <p><b>Study area and characteristics of the disaster</b></p> <p>Line 58: What is a fragile landscape? Perhaps prone to slope failures?</p> <ul style="list-style-type: none"> <li>•Line 59-60: Show these faults on Figure 2.</li> <li>•Line 61. The major rock types listed here do not match Figure 2. Please revise.</li> </ul>                                                                                                                                                                                                                                                                                                                                                                                                                                                                                                                                                                                                                                                                                                                                                                                                                                                                           | <p>Thanks, yes, by fragile landscape we mean the weakened geological formations and lithology susceptible to slope failures.</p> <p>Thanks for the suggestion. We include the faults in Figure 2.</p> <p>Thanks for the observation, we revise the legend in Figure 2.</p> <p>Thanks, we include the glossary of India Meteorological Department (IMD) definition of</p>                                                                                                                                                                                                                                                                                                                                                                                                                                                                                                                                                                                                                                                                                                                                                       |

|   |                                                                                                                                                                                                                                                                                                                                                                                                                                                                                                                                                                                                                                                                                                                                                                                                                                                                                                                                                                                                                                                                                                                                                                                                                                                                                                                            |                                                                                                                                                                                                                                                                                                                                                                                                                                                                                                                                                                                                                                                                                                                                                                                                                                                                                                                                                                                                                                                                                                                                         |
|---|----------------------------------------------------------------------------------------------------------------------------------------------------------------------------------------------------------------------------------------------------------------------------------------------------------------------------------------------------------------------------------------------------------------------------------------------------------------------------------------------------------------------------------------------------------------------------------------------------------------------------------------------------------------------------------------------------------------------------------------------------------------------------------------------------------------------------------------------------------------------------------------------------------------------------------------------------------------------------------------------------------------------------------------------------------------------------------------------------------------------------------------------------------------------------------------------------------------------------------------------------------------------------------------------------------------------------|-----------------------------------------------------------------------------------------------------------------------------------------------------------------------------------------------------------------------------------------------------------------------------------------------------------------------------------------------------------------------------------------------------------------------------------------------------------------------------------------------------------------------------------------------------------------------------------------------------------------------------------------------------------------------------------------------------------------------------------------------------------------------------------------------------------------------------------------------------------------------------------------------------------------------------------------------------------------------------------------------------------------------------------------------------------------------------------------------------------------------------------------|
|   | <ul style="list-style-type: none"> <li>•Line 63. Please define “extreme rainfall” in this case. This suggests that over 6000 landslides occurred, but many fewer are shown in Figures 1 and 2. Why?</li> <li>•Line 65. Reference for number of casualties and economic impacts needed.</li> <li>•<b>Figure 2.</b> It is difficult to distinguish the red and black debris flows / slides in 2b.</li> <li>•<b>Figure 3.</b> Please label Chorabari glacier lake on Figures 1 and 2.</li> </ul>                                                                                                                                                                                                                                                                                                                                                                                                                                                                                                                                                                                                                                                                                                                                                                                                                              | <p>extreme rainfall in the revised manuscript. 6000 landslides occurred al over Uttarakhand but only 120 occurred within the study area. We include a map of Uttarakhand showing all 6000 landslides.</p> <p>Thanks, we include these references in the revised manuscript.</p> <p>Thanks for the suggestion. We revise the symbology in Figure 2.</p> <p>Thanks to your suggestion, we include the Chorabari glacier lake in Figure 1 and 2.</p>                                                                                                                                                                                                                                                                                                                                                                                                                                                                                                                                                                                                                                                                                       |
| 5 | <p><b>Data and methods</b></p> <ul style="list-style-type: none"> <li>• Data and methods general comment: this section does not provide sufficient detail to reproduce or evaluate the results, and is somewhat difficult to follow. Particularly, not all parameters are defined in the text, models are mis-cited, datasets are not cited, and key modeling choices and approaches are not described. This section must be more thorough.</li> <li>•Line 75. Please explain briefly what this model is, what it does, and what it is used for in this study. Model needs a citation.</li> <li>•Line 77. Figure reference wrong, please double check and correct throughout the manuscript.</li> <li>•Line 79. I infer that Locations 1-4 are meteorological stations that record daily rainfall, but this needs to be specified in the text.</li> <li>•<b>Figure 5.</b> I am not an expert in weather models, but I suppose that the information presented in this figure would not be sufficient to reproduce the results. I recommend creating supplementary tables that specify the inputs used for all models. All datasets require citations.</li> <li>•<b>Figure 6.</b> From this figure, I would like to be able to evaluate whether the simulated hourly rainfall time series at each of the stations</li> </ul> | <p>Thanks for your careful examination and suggestion for improvements. We include detailed information regarding the model parameter or reproduction of the results. Defining all parameters in the text, cite the models properly, providing citations to the datasets, we try to make this section more thorough.</p> <p>Thanks to your suggestion, we provide brief description of the model with citations.</p> <p>Thanks for pointing out this mistake. We carefully check the Figure references throughout the manuscript.</p> <p>Thanks for the suggestion. Included the locations from where we infer meteorological data in the text. But these are not meteorological stations.</p> <p>Thanks for the valuable suggestion. We include a very detailed information to reproduce the WRF model analysis and include primary information in the main manuscript and secondary data in the supplementary. We also cite the datasets retrieved from secondary sources properly.</p> <p>Thanks for the useful suggestion. We reformat Figure 6. We also perform a time series validation using statistical evaluators RMSE and</p> |

|  |                                                                                                                                                                                                                                                                                                                                                                                                                                                                                                                                                                                                                                                                                                                                                                                                                                                                                                                                                                                                                                                                                                                                                                                                                                                                                                                                                                                                                                                                                                                                                                                                                                                                                                     |                                                                                                                                                                                                                                                                                                                                                                                                                                                                                                                                                                                                                                                                                                                                                                                                                                                                                                                                                                                                                                                                                                                                                                                                                                                                                                                             |
|--|-----------------------------------------------------------------------------------------------------------------------------------------------------------------------------------------------------------------------------------------------------------------------------------------------------------------------------------------------------------------------------------------------------------------------------------------------------------------------------------------------------------------------------------------------------------------------------------------------------------------------------------------------------------------------------------------------------------------------------------------------------------------------------------------------------------------------------------------------------------------------------------------------------------------------------------------------------------------------------------------------------------------------------------------------------------------------------------------------------------------------------------------------------------------------------------------------------------------------------------------------------------------------------------------------------------------------------------------------------------------------------------------------------------------------------------------------------------------------------------------------------------------------------------------------------------------------------------------------------------------------------------------------------------------------------------------------------|-----------------------------------------------------------------------------------------------------------------------------------------------------------------------------------------------------------------------------------------------------------------------------------------------------------------------------------------------------------------------------------------------------------------------------------------------------------------------------------------------------------------------------------------------------------------------------------------------------------------------------------------------------------------------------------------------------------------------------------------------------------------------------------------------------------------------------------------------------------------------------------------------------------------------------------------------------------------------------------------------------------------------------------------------------------------------------------------------------------------------------------------------------------------------------------------------------------------------------------------------------------------------------------------------------------------------------|
|  | <p>matches the daily records. Please rescale Fig 6a such that this is possible, or better yet, perform such a validation.</p> <ul style="list-style-type: none"> <li>•Line 80. Does the WRF model only output one possible time series? Or did you somehow select this time series from a range of options? How sensitive are these results to inputs and modeling choices? Please document any modeling choices or selections.</li> <li>•Line 81. This states that the authors have averaged the hourly precipitation time series at the four station locations and used this to drive the debris flow model. I do not understand this choice. From Figure 1, I infer that between Locations 1-2 and 3-4, there are 5000 m of elevation difference. I would expect this to introduce substantial variability in rainfall intensities (Destro et al., 2017; Iadanza et al., 2016) and therefore do not expect an average to appropriately capture this event. I do not understand why, when a 1.8 km resolution time series over the catchment is available, this information was not used to drive the debris flow model. I would recommend taking advantage of this available information, but at the very least, a sound justification of averaging is needed.</li> <li>•Line 84. Here, please also briefly describe what this model is, what it does, and what it is used for in this study. (e.g. "We use a numerical debris flow initiation and runout model..."). Siva Subramian et al., 2021 is a pre-print; this is not a sufficient citation. More detail is needed in this manuscript describing this model.</li> <li>•Line 91. Depth of soil or regolith is a very important</li> </ul> | <p>Chi-square tests to validate the WRF model results with the observed data.</p> <p>Thanks for the question. For rainfall the WRF model provide one time series per pixel/resolution of the model. These results are sensitive to the initial boundary condition as well the opted physics to run the model. We document these modelling choices clearly.</p> <p>Thank you very much for this valuable comment and suggestion. We agree with you. We opted to average out the rainfall at these four locations in order to reduce any uncertainties (both over estimations and under estimations). However, we understand from your suggestion that this may not be a good option considering the elevation difference.</p> <p>We re run all the debris flow modelling using spatially different maps for every one-hour timesteps to drive the debris flows.</p> <p>We could see some improvements in the analysis outputs. Thank you very much for your recommendation.</p> <p>Thank you for this suggestion. We include all details of the model's governing equations with proper justification and citations. We add more detail about the numerical model in this manuscript instead of simply citing the previous literature.</p> <p>Thank you very much for your careful observation. We use Hengl et al. 2017</p> |
|--|-----------------------------------------------------------------------------------------------------------------------------------------------------------------------------------------------------------------------------------------------------------------------------------------------------------------------------------------------------------------------------------------------------------------------------------------------------------------------------------------------------------------------------------------------------------------------------------------------------------------------------------------------------------------------------------------------------------------------------------------------------------------------------------------------------------------------------------------------------------------------------------------------------------------------------------------------------------------------------------------------------------------------------------------------------------------------------------------------------------------------------------------------------------------------------------------------------------------------------------------------------------------------------------------------------------------------------------------------------------------------------------------------------------------------------------------------------------------------------------------------------------------------------------------------------------------------------------------------------------------------------------------------------------------------------------------------------|-----------------------------------------------------------------------------------------------------------------------------------------------------------------------------------------------------------------------------------------------------------------------------------------------------------------------------------------------------------------------------------------------------------------------------------------------------------------------------------------------------------------------------------------------------------------------------------------------------------------------------------------------------------------------------------------------------------------------------------------------------------------------------------------------------------------------------------------------------------------------------------------------------------------------------------------------------------------------------------------------------------------------------------------------------------------------------------------------------------------------------------------------------------------------------------------------------------------------------------------------------------------------------------------------------------------------------|

|  |                                                                                                                                                                                                                                                                                                                                                                                                                                                                                                                                                                                                                                                                                                                                                                                                                                                                                                                                                                                                                                                                                                                                                                                                                                                                                                                                                                                                                                                                                                                                                                                                                                                                                                                                                   |                                                                                                                                                                                                                                                                                                                                                                                                                                                                                                                                                                                                                                                                                                                                                                                                                                                                                                                                                                                                                                                                                                                                                                                                                                                                                                    |
|--|---------------------------------------------------------------------------------------------------------------------------------------------------------------------------------------------------------------------------------------------------------------------------------------------------------------------------------------------------------------------------------------------------------------------------------------------------------------------------------------------------------------------------------------------------------------------------------------------------------------------------------------------------------------------------------------------------------------------------------------------------------------------------------------------------------------------------------------------------------------------------------------------------------------------------------------------------------------------------------------------------------------------------------------------------------------------------------------------------------------------------------------------------------------------------------------------------------------------------------------------------------------------------------------------------------------------------------------------------------------------------------------------------------------------------------------------------------------------------------------------------------------------------------------------------------------------------------------------------------------------------------------------------------------------------------------------------------------------------------------------------|----------------------------------------------------------------------------------------------------------------------------------------------------------------------------------------------------------------------------------------------------------------------------------------------------------------------------------------------------------------------------------------------------------------------------------------------------------------------------------------------------------------------------------------------------------------------------------------------------------------------------------------------------------------------------------------------------------------------------------------------------------------------------------------------------------------------------------------------------------------------------------------------------------------------------------------------------------------------------------------------------------------------------------------------------------------------------------------------------------------------------------------------------------------------------------------------------------------------------------------------------------------------------------------------------|
|  | <p>parameter. How was this determined? Although Figure 8c plots “Soil Depth,” this is not described anywhere in the text. The field work photos from Figure 3 do not suggest much soil development on these slopes, so is this actually regolith depth?</p> <ul style="list-style-type: none"> <li>• Line 94. “based in part” – which part? Again, the modeling strategy needs a more thorough description in this text.</li> <li>• Line 96. All parameter symbols in Table 1 need to be defined.</li> <li>• Line 97. Why do you choose 0.05 m<sup>3</sup>/m<sup>3</sup> as an initial moisture content across the entire catchment? Is this reasonable? From Figure 6, it appears that it had been raining in the days prior to the event, so dry hillslopes may not be an appropriate assumption. Why not spin up the hydrological model with time series from before the event, as this is likely available from the WRF model?</li> <li>• Line 99. How is the hourly rainfall data used with a time step in seconds? Please specify.</li> <li>• Line 102. What stream ordering system is referred to here? It would help to label these on Figure 1 or create another figure.</li> <li>• <b>Table 1.</b> Please describe all symbols used in the text. The “calibration and back analysis” for d<sub>50</sub>, delta_e, and delta_d is not described anywhere. This is a major issue, as the values of these parameters may have a strong impact on the results. Are these values justified considering your experience in the field? Judging from the photos in Figure 3, I’m not convinced that a d<sub>50</sub> of 2.0 mm is appropriate, for example. In any case, some sensitivity analysis should be reported and discussed.</li> </ul> | <p>SoilGrids250m dataset to derive the soil depth or regolith thickness.</p> <p>You are correct. The depth used is actually regolith depth.</p> <p>Thanks again. We include a thorough description of the modelling strategy in the revised manuscript.</p> <p>Thanks to your suggestion, we define all parameters defined in Table 1.</p> <p>Thank you for your valuable suggestion. Since the initial conditions could be sensitive to the triggering time of debris flows, we had to decide that carefully.</p> <p>We run a decadal simulation of rainfall-runoff/infiltration using daily timesteps of rainfall (data from IMD) from 2003 to 2013. We used the initial moisture content from the results.</p> <p>Thanks for this very important question. We explain the process of converting the input boundary condition into seconds from hours.</p> <p>Thank you again, the catchment contains stream order 1,2 and 3 and occasionally 0 order streams. We provide them in Figure 1 (revision).</p> <p>Thanks for this another important question. Yes, you are correct and we agree with you. Through our field work, we observed a diverge range of grain sizes and quantified them using sample collection.</p> <p>We also perform a sensitivity analysis and discuss the results.</p> |
|--|---------------------------------------------------------------------------------------------------------------------------------------------------------------------------------------------------------------------------------------------------------------------------------------------------------------------------------------------------------------------------------------------------------------------------------------------------------------------------------------------------------------------------------------------------------------------------------------------------------------------------------------------------------------------------------------------------------------------------------------------------------------------------------------------------------------------------------------------------------------------------------------------------------------------------------------------------------------------------------------------------------------------------------------------------------------------------------------------------------------------------------------------------------------------------------------------------------------------------------------------------------------------------------------------------------------------------------------------------------------------------------------------------------------------------------------------------------------------------------------------------------------------------------------------------------------------------------------------------------------------------------------------------------------------------------------------------------------------------------------------------|----------------------------------------------------------------------------------------------------------------------------------------------------------------------------------------------------------------------------------------------------------------------------------------------------------------------------------------------------------------------------------------------------------------------------------------------------------------------------------------------------------------------------------------------------------------------------------------------------------------------------------------------------------------------------------------------------------------------------------------------------------------------------------------------------------------------------------------------------------------------------------------------------------------------------------------------------------------------------------------------------------------------------------------------------------------------------------------------------------------------------------------------------------------------------------------------------------------------------------------------------------------------------------------------------|



|  |                                                                                                                                                                                                                                                                                                                                                                                                                                                                                                                                                                                                                                                                                                                                                                                                                                                                                                                                                                                                                                                                                                                                                                                                                                                                                                                                                                                                                                                                                                                                                                                                                                                                                                                                             |                                                                                                                                                                                                                                                                                                                                                                                                                                                                                                                                                                                                                                                                                                                                                                                                                                                                                                                                                                                                                                                                                                                                                                                                                                                                                                                                                                                                                                                                                                                                                                                                                                                                                                                                                              |
|--|---------------------------------------------------------------------------------------------------------------------------------------------------------------------------------------------------------------------------------------------------------------------------------------------------------------------------------------------------------------------------------------------------------------------------------------------------------------------------------------------------------------------------------------------------------------------------------------------------------------------------------------------------------------------------------------------------------------------------------------------------------------------------------------------------------------------------------------------------------------------------------------------------------------------------------------------------------------------------------------------------------------------------------------------------------------------------------------------------------------------------------------------------------------------------------------------------------------------------------------------------------------------------------------------------------------------------------------------------------------------------------------------------------------------------------------------------------------------------------------------------------------------------------------------------------------------------------------------------------------------------------------------------------------------------------------------------------------------------------------------|--------------------------------------------------------------------------------------------------------------------------------------------------------------------------------------------------------------------------------------------------------------------------------------------------------------------------------------------------------------------------------------------------------------------------------------------------------------------------------------------------------------------------------------------------------------------------------------------------------------------------------------------------------------------------------------------------------------------------------------------------------------------------------------------------------------------------------------------------------------------------------------------------------------------------------------------------------------------------------------------------------------------------------------------------------------------------------------------------------------------------------------------------------------------------------------------------------------------------------------------------------------------------------------------------------------------------------------------------------------------------------------------------------------------------------------------------------------------------------------------------------------------------------------------------------------------------------------------------------------------------------------------------------------------------------------------------------------------------------------------------------------|
|  | <ul style="list-style-type: none"> <li>•Line 104. Please use spellcheck throughout. See comments on I-D thresholds for LEWS in intro.</li> <li>•Line 108. 'Berti...' - this should be moved to the discussion.</li> <li>•Line 110. The choice of "inter-event-time" varies widely between studies. Jiang et al., 2021 will have made one choice, but there are many others in the literature (Segoni et al., 2018). Please describe and justify your choice here.</li> <li>•Line 112. Please just describe your modeling approach here. The relationship between physical processes and statistical thresholds is material for the discussion.</li> <li>•Line 116. There is no methodological description of how the model was calibrated "above". This must be added.</li> <li>•Line 117. I would make it very clear that you are now moving away from the 2013 event and into scenario analysis. This was hard for me to follow.</li> <li>•Line 119. Please specify what confluence is referred to here.</li> <li>•Line 119-120. This method needs much more explanation. There are many statistical methods in use to establish I-D thresholds (Segoni et al., 2018, 2014; Staley et al., 2013; Brunetti et al., 2010; Scheevel et al., 2017). How do you select the threshold here?</li> <li>•Line 120. I was confused at this point that the text moves back to the 2013 event. I would recommend restructuring to separate the analysis of the 2013 event from the scenario analysis for the I-D threshold.</li> <li>•Line 126. What values were used for I, D, and C_r in this equation? How did you define the rainfall event? I do not necessarily expect an empirical equation originally developed for Taiwan to be a</li> </ul> | <p>Thanks for the suggestion. We will perform spellcheck throughout the article when we finish our revised manuscript.</p> <p>Thanks, we move this citation and corresponding discussion to the discussion.</p> <p>Thank you for your comment here. We understand and agree IET could be different through diverse choices. We describe and reason our choice used in this study.</p> <p>Thank you very much for your valuable suggestion. We describe the relationship between physical processes and statistical thresholds in the discussion elaborately.</p> <p>Thanks. We include a methodological description of the model calibration.</p> <p>Thanks for your comment. Once the model is calibrated for the event, we run simulations using constant rainfall intensities to derive the I-D thresholds. Apologies for the confusion here, we provide detailed information in the revised manuscript.</p> <p>The confluence referred here in is the Gauri Kund, shown in Figure 1.</p> <p>Thanks for the very important question. The statistical methods work only when we have an abundant data of rainfall intensities and debris flow occurrences. Our method actually supplements the statistical analysis by providing triggering intensity of debris flows so that any further approach shall be used to determine the threshold. We explain our choice in the revision.</p> <p>Thank you for this useful suggestion. For clarity, we restructure the scenario analysis from the 2013 event.</p> <p>Thank you very much. Your point is valid and true. Since we lack the true volume of landslides in this study area, we had to rely on these empirical estimates. First, we validate the area-volume estimation using different empirical</p> |
|--|---------------------------------------------------------------------------------------------------------------------------------------------------------------------------------------------------------------------------------------------------------------------------------------------------------------------------------------------------------------------------------------------------------------------------------------------------------------------------------------------------------------------------------------------------------------------------------------------------------------------------------------------------------------------------------------------------------------------------------------------------------------------------------------------------------------------------------------------------------------------------------------------------------------------------------------------------------------------------------------------------------------------------------------------------------------------------------------------------------------------------------------------------------------------------------------------------------------------------------------------------------------------------------------------------------------------------------------------------------------------------------------------------------------------------------------------------------------------------------------------------------------------------------------------------------------------------------------------------------------------------------------------------------------------------------------------------------------------------------------------|--------------------------------------------------------------------------------------------------------------------------------------------------------------------------------------------------------------------------------------------------------------------------------------------------------------------------------------------------------------------------------------------------------------------------------------------------------------------------------------------------------------------------------------------------------------------------------------------------------------------------------------------------------------------------------------------------------------------------------------------------------------------------------------------------------------------------------------------------------------------------------------------------------------------------------------------------------------------------------------------------------------------------------------------------------------------------------------------------------------------------------------------------------------------------------------------------------------------------------------------------------------------------------------------------------------------------------------------------------------------------------------------------------------------------------------------------------------------------------------------------------------------------------------------------------------------------------------------------------------------------------------------------------------------------------------------------------------------------------------------------------------|

|   |                                                                                                                                                                                                                                                                                                                                                                                                                                                                                                                                                                                                                                                                                                                                                                                                                                                                                                                                                                                                                                                                                                             |                                                                                                                                                                                                                                                                                                                                                                                                                                                                                                                                                                                                                                                                                                                                                                                                                                                                                                                                                                                                                                                                                                                                           |
|---|-------------------------------------------------------------------------------------------------------------------------------------------------------------------------------------------------------------------------------------------------------------------------------------------------------------------------------------------------------------------------------------------------------------------------------------------------------------------------------------------------------------------------------------------------------------------------------------------------------------------------------------------------------------------------------------------------------------------------------------------------------------------------------------------------------------------------------------------------------------------------------------------------------------------------------------------------------------------------------------------------------------------------------------------------------------------------------------------------------------|-------------------------------------------------------------------------------------------------------------------------------------------------------------------------------------------------------------------------------------------------------------------------------------------------------------------------------------------------------------------------------------------------------------------------------------------------------------------------------------------------------------------------------------------------------------------------------------------------------------------------------------------------------------------------------------------------------------------------------------------------------------------------------------------------------------------------------------------------------------------------------------------------------------------------------------------------------------------------------------------------------------------------------------------------------------------------------------------------------------------------------------------|
|   | <p>reasonable approximation of debris flow volume in the Himalaya. Is such an equation transferable? Why? This needs to be discussed.</p> <ul style="list-style-type: none"> <li>• <b>Figure 9.</b> It is not clear if this is a schematic figure or if it is results. If it's a schematic, please note that there is rarely such a clean separation of non-landslides and landslides, such that there are often rainfall events that exceed the threshold but do not trigger landslides.</li> <li>• Line 128. Geological Index based on lithology needs explanation and documentation of values used.</li> </ul>                                                                                                                                                                                                                                                                                                                                                                                                                                                                                           | <p>equations other than the one used in the first version of the manuscript.</p> <p>We discuss them in detail in the revised version.</p> <p>Thank, we agree. This is a schematic figure and we agree to your point that clean separation of non-landslides and landslides is not possible. We amend this figure in the revised manuscript.</p> <p>We include the detailed method of selection of GI based on lithology in the revised manuscript.</p>                                                                                                                                                                                                                                                                                                                                                                                                                                                                                                                                                                                                                                                                                    |
| 6 | <p><b>Results</b></p> <ul style="list-style-type: none"> <li>• General comment on the results section: This section is much too short, and does not describe the key results of the study. These should be presented for the reader.</li> <li>• Lines 130-136. As I mentioned previously, this calibration needs to be documented in the methods section. The similar volume estimates are by design, as the numerical model was tuned to achieve this. However, judging from Figure 10, the model substantially overestimates the spatial area of debris flow deposits. I question whether such a model can be "considered calibrated." At the very least, this overestimation must be discussed. I would also like to see evidence that the numerical model can sufficiently reproduce debris flow <i>timing</i> during the 2013 event, not just volume. This is key if such a model is to be used for warning.</li> <li>• Line 137. The 10 mm/hr plot should be shown in Figure 11. I am not convinced of the choice of intensities. First, using a constant intensity over the course of the</li> </ul> | <p>Thank you for your careful comments on the results. Following your suggestion, we revised the result section describing all the key results of this study.</p> <p>Thank you very much. We totally agree to your point here. The similar volume estimates are by design, as the numerical model was tuned to achieve this.</p> <p>Overestimation is an issue in terms of spatial extents. We include the True Skill Statistics bases test to test the accuracy of the model. We also discuss the reasons and implications of the overestimation of spatial extents of the model in the revised version of the manuscript.</p> <p>Thank you for your comment on timing of debris flows. We do agree this is very significant in terms of early warning. We compare the timing of debris flow initiation with the recorded timing of actual events from the literature. We include these details in the revised manuscript.</p> <p>Thank you for your critique on the choice of constant rainfall intensities. The thresholds for a study area should be accountable for any given rainfall events and not just one event i.e., 2013.</p> |



|  |                                                                                                                                                                                                                                                                                                                                                                                                                                                                                                                                                                                                                                                                                                                                                                                                                                                                                                                                                                                                                                                                                                                                                                                                                                                                                                                                                                                                                                                                                                                                                                                                                                                                                                                                                                       |                                                                                                                                                                                                                                                                                                                                                                                                                                                                                                                                                                                                                                                                                                                                         |
|--|-----------------------------------------------------------------------------------------------------------------------------------------------------------------------------------------------------------------------------------------------------------------------------------------------------------------------------------------------------------------------------------------------------------------------------------------------------------------------------------------------------------------------------------------------------------------------------------------------------------------------------------------------------------------------------------------------------------------------------------------------------------------------------------------------------------------------------------------------------------------------------------------------------------------------------------------------------------------------------------------------------------------------------------------------------------------------------------------------------------------------------------------------------------------------------------------------------------------------------------------------------------------------------------------------------------------------------------------------------------------------------------------------------------------------------------------------------------------------------------------------------------------------------------------------------------------------------------------------------------------------------------------------------------------------------------------------------------------------------------------------------------------------|-----------------------------------------------------------------------------------------------------------------------------------------------------------------------------------------------------------------------------------------------------------------------------------------------------------------------------------------------------------------------------------------------------------------------------------------------------------------------------------------------------------------------------------------------------------------------------------------------------------------------------------------------------------------------------------------------------------------------------------------|
|  | <ul style="list-style-type: none"> <li>•Line 152. See comments in intro on LEWS in other countries. Also, ID thresholds are estimated, not forecasted.</li> <li>•<b>Figure 12.</b> The comparison between the Lakhera et al., 2020 threshold and the threshold estimated in this study is not valid. The Lakhera et al., 2020 threshold plotted here is specified as <math>I_{max}</math>, whereas the threshold estimated in this study is based on average intensity. Lakhera et al., 2020, specify thresholds for debris flows and debris slides, but the threshold plotted here is for all mass movements.</li> <li>•Line 154. In the introduction, Mathew et al., 2014 is cited, which provides an I-D threshold that appears to be based on hourly data. This would be an additional point of comparison. Furthermore, as this is a publication for an international journal, a comparison of these results with the international literature is warranted. (Guzzetti et al., 2008; Segoni et al., 2018) are starting points. Importantly, there should be a discussion of why the results found here may be similar or different to other results reported in the literature. (Bogaard and Greco, 2018) may be helpful for this.</li> <li>•Overall comment on the discussion: Since this study intended to estimate I-D thresholds for early warning, there must be a discussion of performance for early warning, but this is missing altogether. At a bare minimum, would this threshold have successfully warned for the 2013 event? How often would the threshold be exceeded otherwise, resulting in false alarms? Is there any case in which missed alarms would occur? (Staley et al., 2013) could be a starting point for considering this.</li> </ul> | <p>Thanks, rephrased as suggested.</p> <p>Thank you for pointing out the invalidity of comparison. In the revision, we include a detailed comparison of the thresholds derived from this study with exiting thresholds available from the literature including Lakhera et al., 2020.</p> <p>Thank you again for this useful comment and suggestion. We agree and compare the threshold with Mathews et al. (2024) and other international literature as suggested.</p> <p>Thank you very much. We try to include a discussion of performance of early warning for the 2023 event. However, we are not in a stage of investigating missed alarms. Anyhow, we will explore the option suggested here following Staley et al., (2013).</p> |
|--|-----------------------------------------------------------------------------------------------------------------------------------------------------------------------------------------------------------------------------------------------------------------------------------------------------------------------------------------------------------------------------------------------------------------------------------------------------------------------------------------------------------------------------------------------------------------------------------------------------------------------------------------------------------------------------------------------------------------------------------------------------------------------------------------------------------------------------------------------------------------------------------------------------------------------------------------------------------------------------------------------------------------------------------------------------------------------------------------------------------------------------------------------------------------------------------------------------------------------------------------------------------------------------------------------------------------------------------------------------------------------------------------------------------------------------------------------------------------------------------------------------------------------------------------------------------------------------------------------------------------------------------------------------------------------------------------------------------------------------------------------------------------------|-----------------------------------------------------------------------------------------------------------------------------------------------------------------------------------------------------------------------------------------------------------------------------------------------------------------------------------------------------------------------------------------------------------------------------------------------------------------------------------------------------------------------------------------------------------------------------------------------------------------------------------------------------------------------------------------------------------------------------------------|

|  |                                                                                                                                                                                                                                                                                                                                                                                                                                                                      |                                                                                                                                                                                                                                                                                                                                                                                                          |
|--|----------------------------------------------------------------------------------------------------------------------------------------------------------------------------------------------------------------------------------------------------------------------------------------------------------------------------------------------------------------------------------------------------------------------------------------------------------------------|----------------------------------------------------------------------------------------------------------------------------------------------------------------------------------------------------------------------------------------------------------------------------------------------------------------------------------------------------------------------------------------------------------|
|  | <ul style="list-style-type: none"> <li>• Additional overall comment on the discussion: many limitations are listed, but without discussing how these might impact the identified threshold. Indeed, many modeling choices were made throughout the study, and these may induce uncertainty in the threshold, but that uncertainty is not quantified or discussed. The discussion should address these sources of uncertainty.</li> </ul>                             | <p>Thank you very much. We include detailed discussion on the limitations and their impact would be on the identified threshold quantifying the uncertainty in each step. Also, we address the source of uncertainties and the possible ways to address them.</p>                                                                                                                                        |
|  | <p><b>Conclusions</b></p> <ul style="list-style-type: none"> <li>• Overall comment on the conclusions: The conclusions section repeats introductory and methods material, but does not reach conclusions based on the results presented in this study. The final statement that the approach presented in this study is promising for establishing Te-LEWS in new geological settings is not supported by the analysis or results presented in the study.</li> </ul> | <p>Thanks again. We elaborated the conclusion part detailing the remarks we derived based on the results of this study. We present evidence supporting the applicability of the method to new geological settings by making the arguments relevant to the results obtained from this study.</p>                                                                                                          |
|  | <p><b>Technical corrections</b></p> <p>I refrain from making further technical corrections at this stage, but recommend that the authors consult a native English speaker for proofreading. I also recommend that the authors review the quality standards for submission to NHESS or any other journal and ensure that their manuscript meets these standards prior to submission.</p>                                                                              | <p>We sincerely thank the reviewer for a very careful and considerate examination of the manuscript and for providing us with very specific and detailed comments. We believe, revision following the reviewer's suggestions would definitely improve the quality of this manuscript to meet the standard of NHESS. We will surely ensure our revisions match your expectations prior to submission.</p> |

### Review references

- Bogaard, T. and Greco, R.: Invited perspectives: Hydrological perspectives on precipitation intensity-duration thresholds for landslide initiation: proposing hydro-meteorological thresholds, *Natural Hazards and Earth System Sciences*, 18, 31–39, <https://doi.org/10.5194/nhess-18-31-2018>, 2018.
- Brunetti, M. T., Peruccacci, S., Rossi, M., Luciani, S., Valigi, D., and Guzzetti, F.: Rainfall thresholds for the possible occurrence of landslides in Italy, *Natural Hazards and Earth System Sciences*, 10, 447–458, <https://doi.org/10.5194/nhess-10-447-2010>, 2010.
- Destro, E., Marra, F., Nikolopoulos, E. I., Zocatelli, D., Creutin, J. D., and Borga, M.: Spatial estimation of debris flows-triggering rainfall and its dependence on rainfall return period, *Geomorphology*, 278, 269–279, <https://doi.org/10.1016/j.geomorph.2016.11.019>, 2017.

- D'Odorico, P., Fagherazzi, S., and Rigon, R.: Potential for landsliding: Dependence on hyetograph characteristics, *Journal of Geophysical Research: Earth Surface*, 110, <https://doi.org/10.1029/2004JF000127>, 2005.
- Guzzetti, F., Peruccacci, S., Rossi, M., and Stark, C. P.: The rainfall intensity–duration control of shallow landslides and debris flows: an update, *Landslides*, 5, 3–17, <https://doi.org/10.1007/s10346-007-0112-1>, 2008.
- Guzzetti, F., Gariano, S. L., Peruccacci, S., Brunetti, M. T., Marchesini, I., Rossi, M., and Melillo, M.: Geographical landslide early warning systems, *Earth-Science Reviews*, 200, 102973, <https://doi.org/10.1016/j.earscirev.2019.102973>, 2020.
- Iadanza, C., Trigila, A., and Napolitano, F.: Identification and characterization of rainfall events responsible for triggering of debris flows and shallow landslides, *Journal of Hydrology*, 541, 230–245, <https://doi.org/10.1016/j.jhydrol.2016.01.018>, 2016.
- Intrieri, E., Gigli, G., Casagli, N., and Nadim, F.: Brief communication: Landslide Early Warning System: toolbox and general concepts, *Nat. Hazards Earth Syst. Sci.*, 13, 85–90, <https://doi.org/10.5194/nhess-13-85-2013>, 2013.
- Mathew, J., Babu, D. G., Kundu, S., Kumar, K. V., and Pant, C. C.: Integrating intensity–duration-based rainfall threshold and antecedent rainfall-based probability estimate towards generating early warning for rainfall-induced landslides in parts of the Garhwal Himalaya, India, *Landslides*, 11, 575–588, <https://doi.org/10.1007/s10346-013-0408-2>, 2014.
- Peruccacci, S., Brunetti, M. T., Gariano, S. L., Melillo, M., Rossi, M., and Guzzetti, F.: Rainfall thresholds for possible landslide occurrence in Italy, *Geomorphology*, 290, 39–57, <https://doi.org/10.1016/j.geomorph.2017.03.031>, 2017.
- Scheevel, C. R., Baum, R. L., Mirus, B. B., and Smith, J. B.: Precipitation thresholds for landslide occurrence near Seattle, Mukilteo, and Everett, Washington, *Precipitation thresholds for landslide occurrence near Seattle, Mukilteo, and Everett, Washington*, U.S. Geological Survey, Reston, VA, <https://doi.org/10.3133/ofr20171039>, 2017.
- Segoni, S., Rosi, A., Rossi, G., Catani, F., and Casagli, N.: Analysing the relationship between rainfalls and landslides to define a mosaic of triggering thresholds for regional-scale warning systems, *Natural Hazards and Earth System Sciences*, 14, 2637–2648, <https://doi.org/10.5194/nhess-14-2637-2014>, 2014.
- Segoni, S., Piciullo, L., and Gariano, S. L.: A review of the recent literature on rainfall thresholds for landslide occurrence, *Landslides*, 15, 1483–1501, <https://doi.org/10.1007/s10346-018-0966-4>, 2018.
- Stähli, M., Sättele, M., Huggel, C., McArde, B. W., Lehmann, P., Van Herwijnen, A., Berne, A., Schleiss, M., Ferrari, A., Kos, A., Or, D., and Springman, S. M.: Monitoring and prediction in early warning systems for rapid mass movements, *Natural Hazards and Earth System Sciences*, 15, 905–917, <https://doi.org/10.5194/nhess-15-905-2015>, 2015.
- Staley, D. M., Kean, J. W., Cannon, S. H., Schmidt, K. M., and Laber, J. L.: Objective definition of rainfall intensity–duration thresholds for the initiation of post-fire debris flows in southern California, *Landslides*, 10, 547–562, <https://doi.org/10.1007/s10346-012-0341-9>, 2013.
- Thomas, M. A., Mirus, B. B., and Collins, B. D.: Identifying Physics-Based Thresholds for Rainfall-Induced Landsliding, *Geophysical Research Letters*, 45, 9651–9661, <https://doi.org/10.1029/2018GL079662>, 2018.
