# Supplementary figures and images for: Numerical model derived intensity-duration thresholds for early warning of rainfall-induced debris flows in the Himalayas
Source: Copernicus journal article supplement (doi:10.5194/nhess-2022-297), 2023-01-13

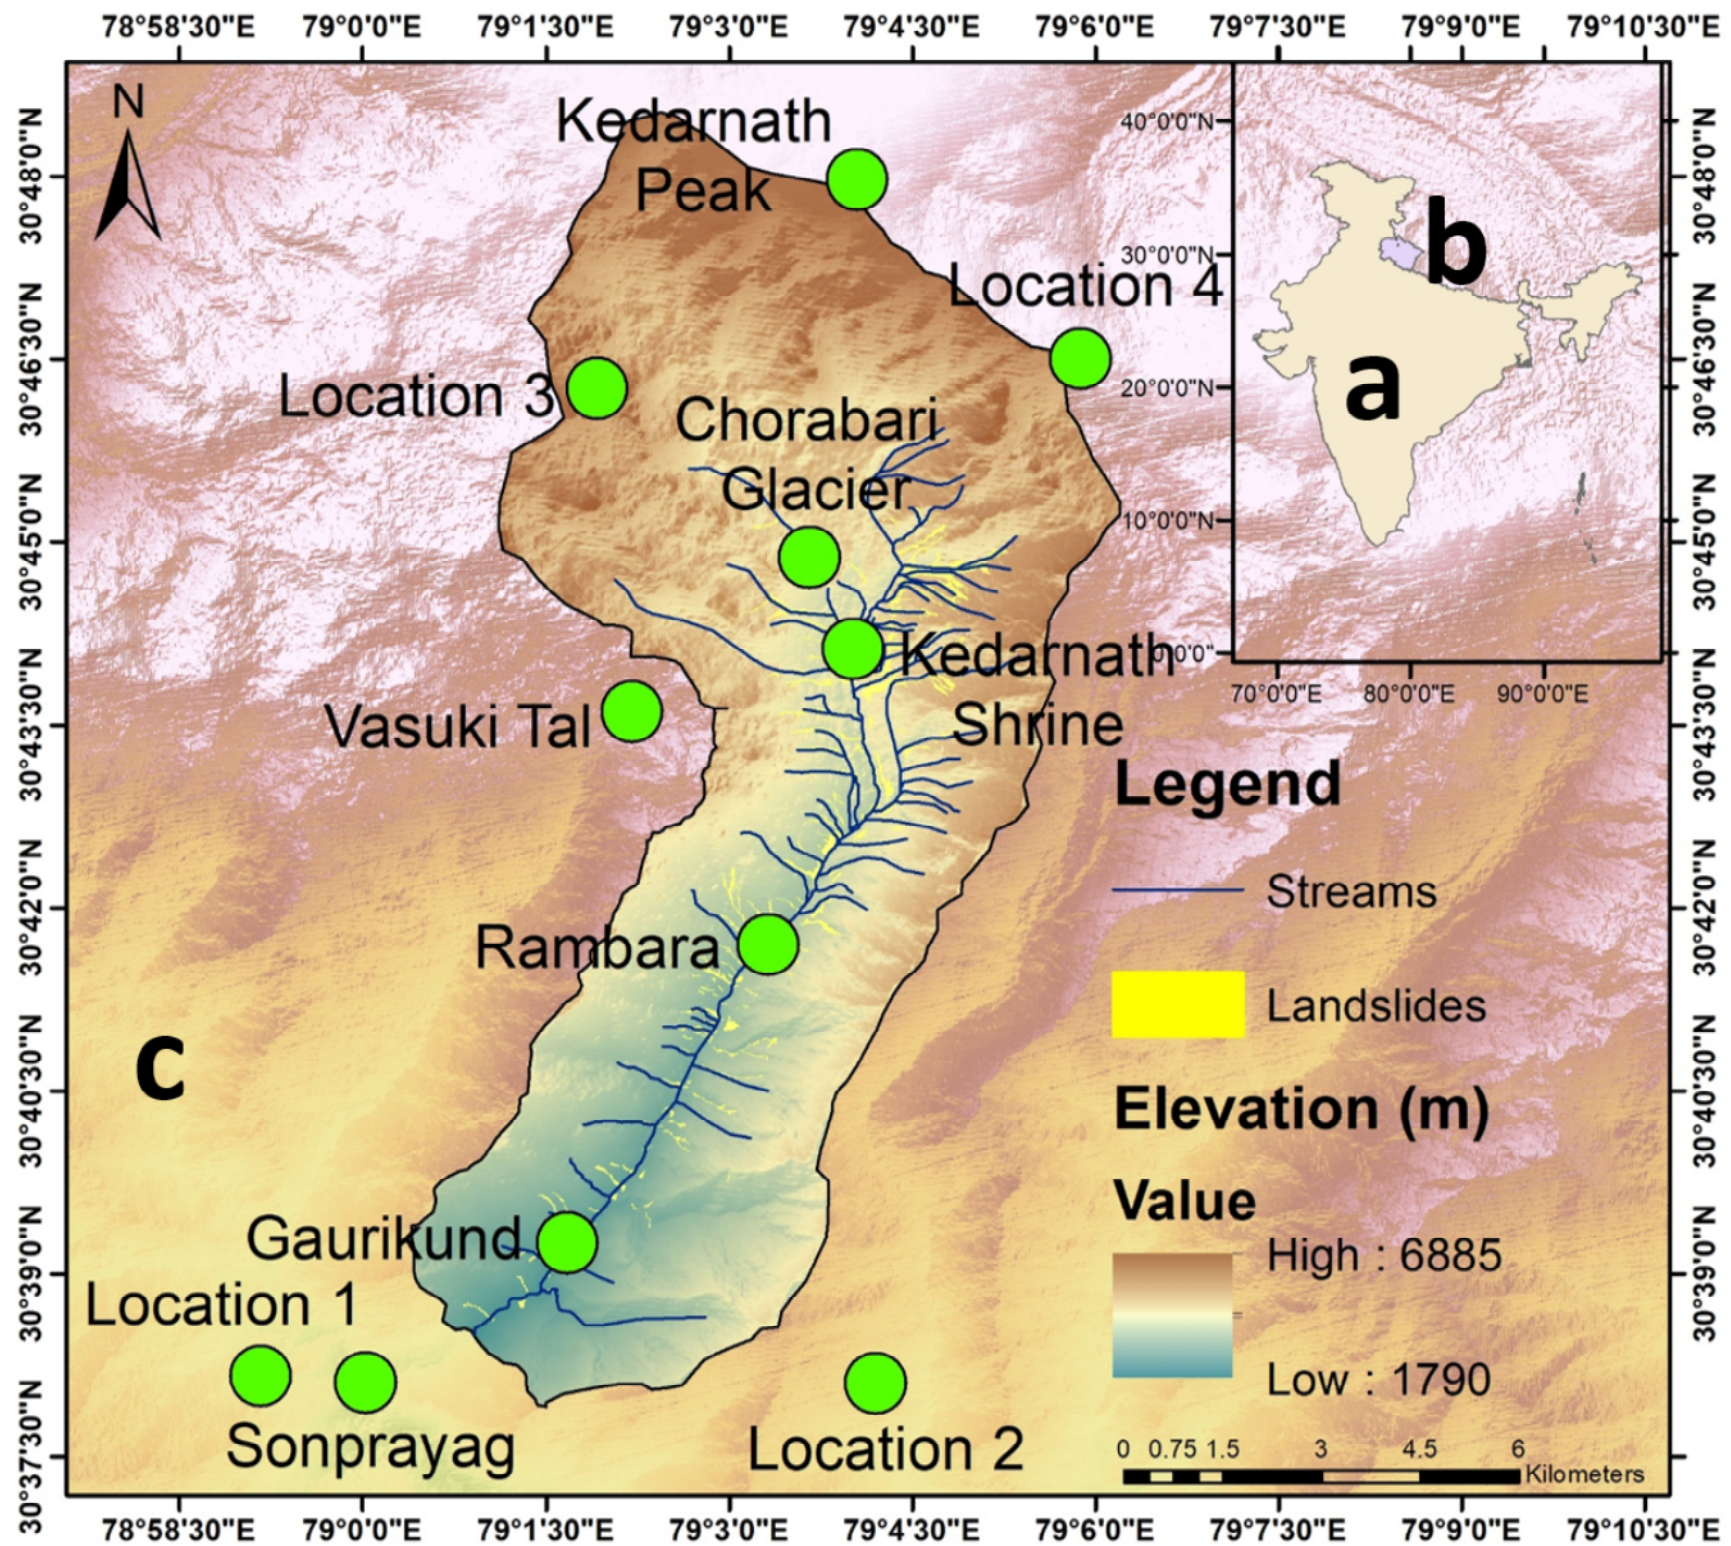

Supplement: Supplementary file 1 [file nhess-2022-297-supplement.zip]

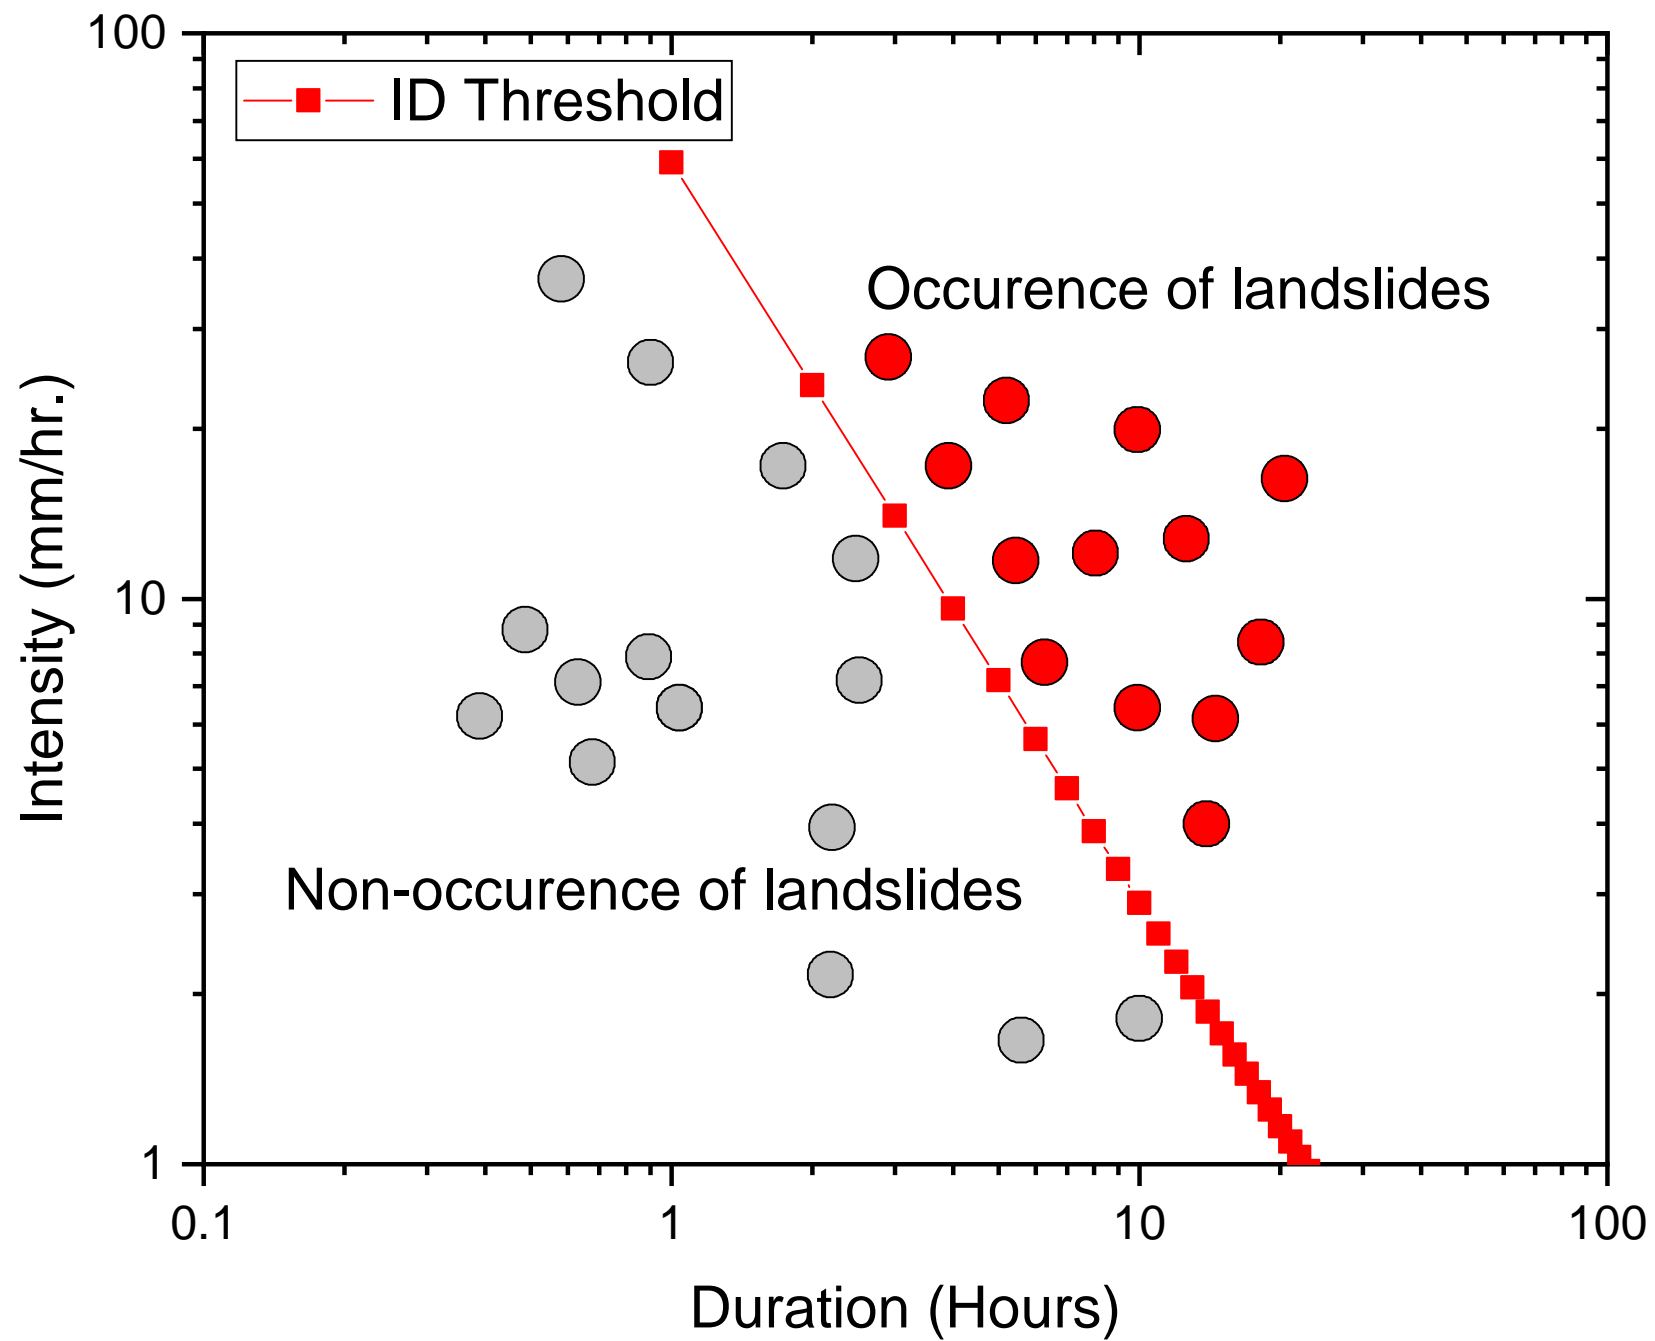

Supplement: Supplementary file 2 [file nhess-2022-297-supplement.zip]

a)

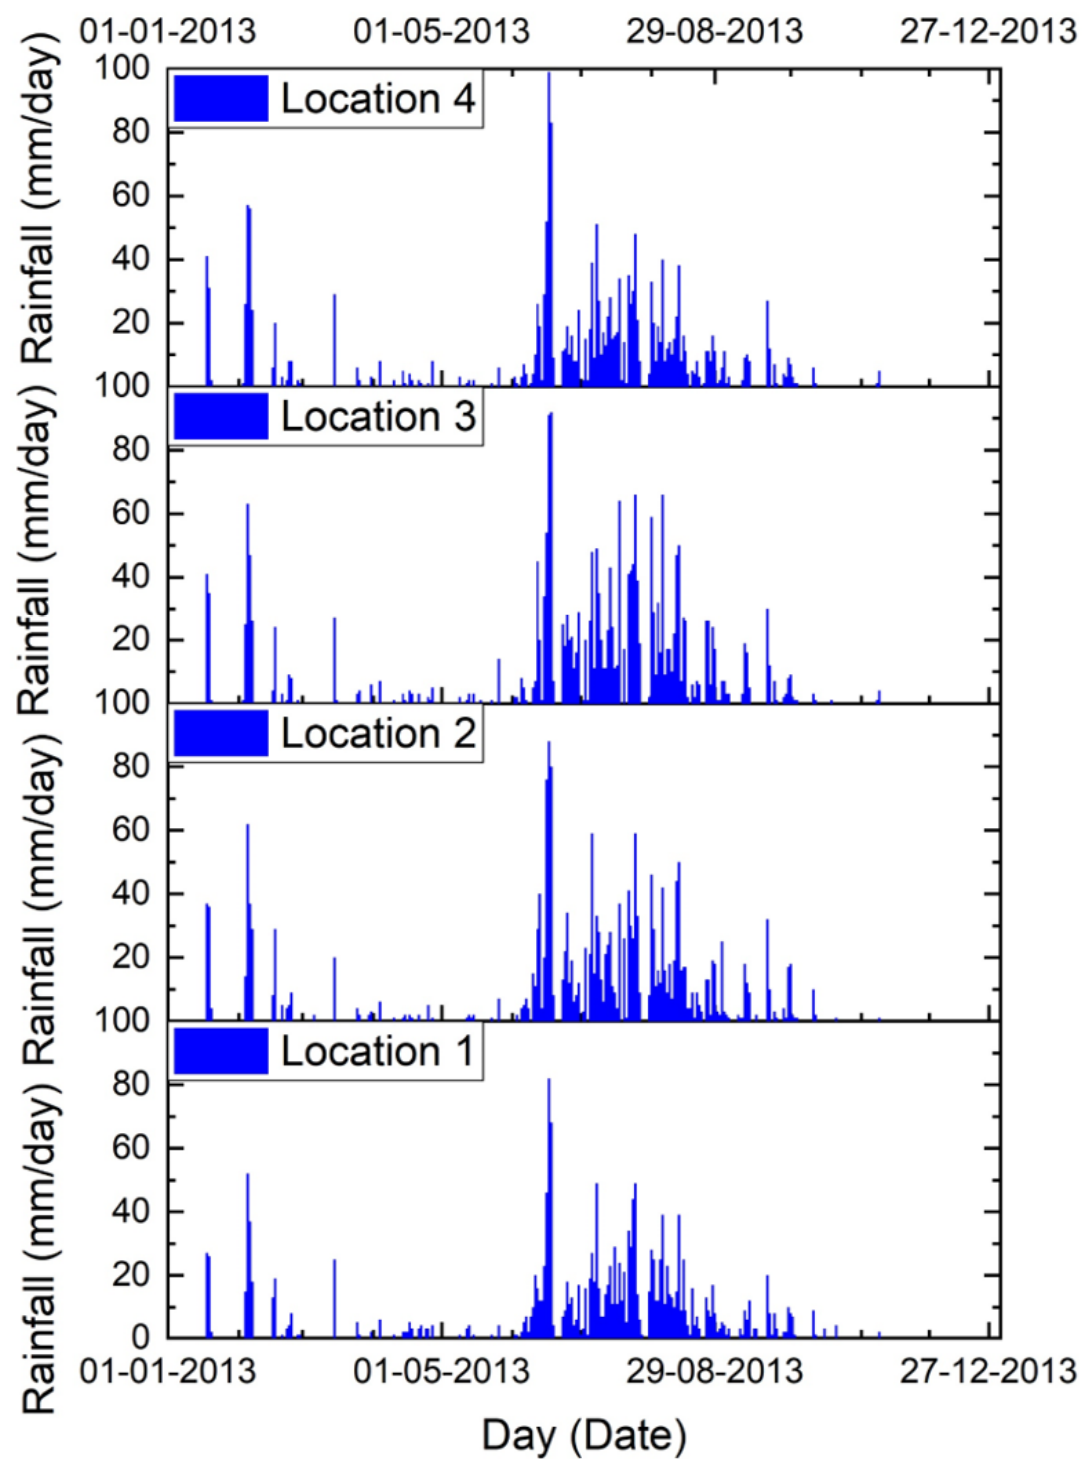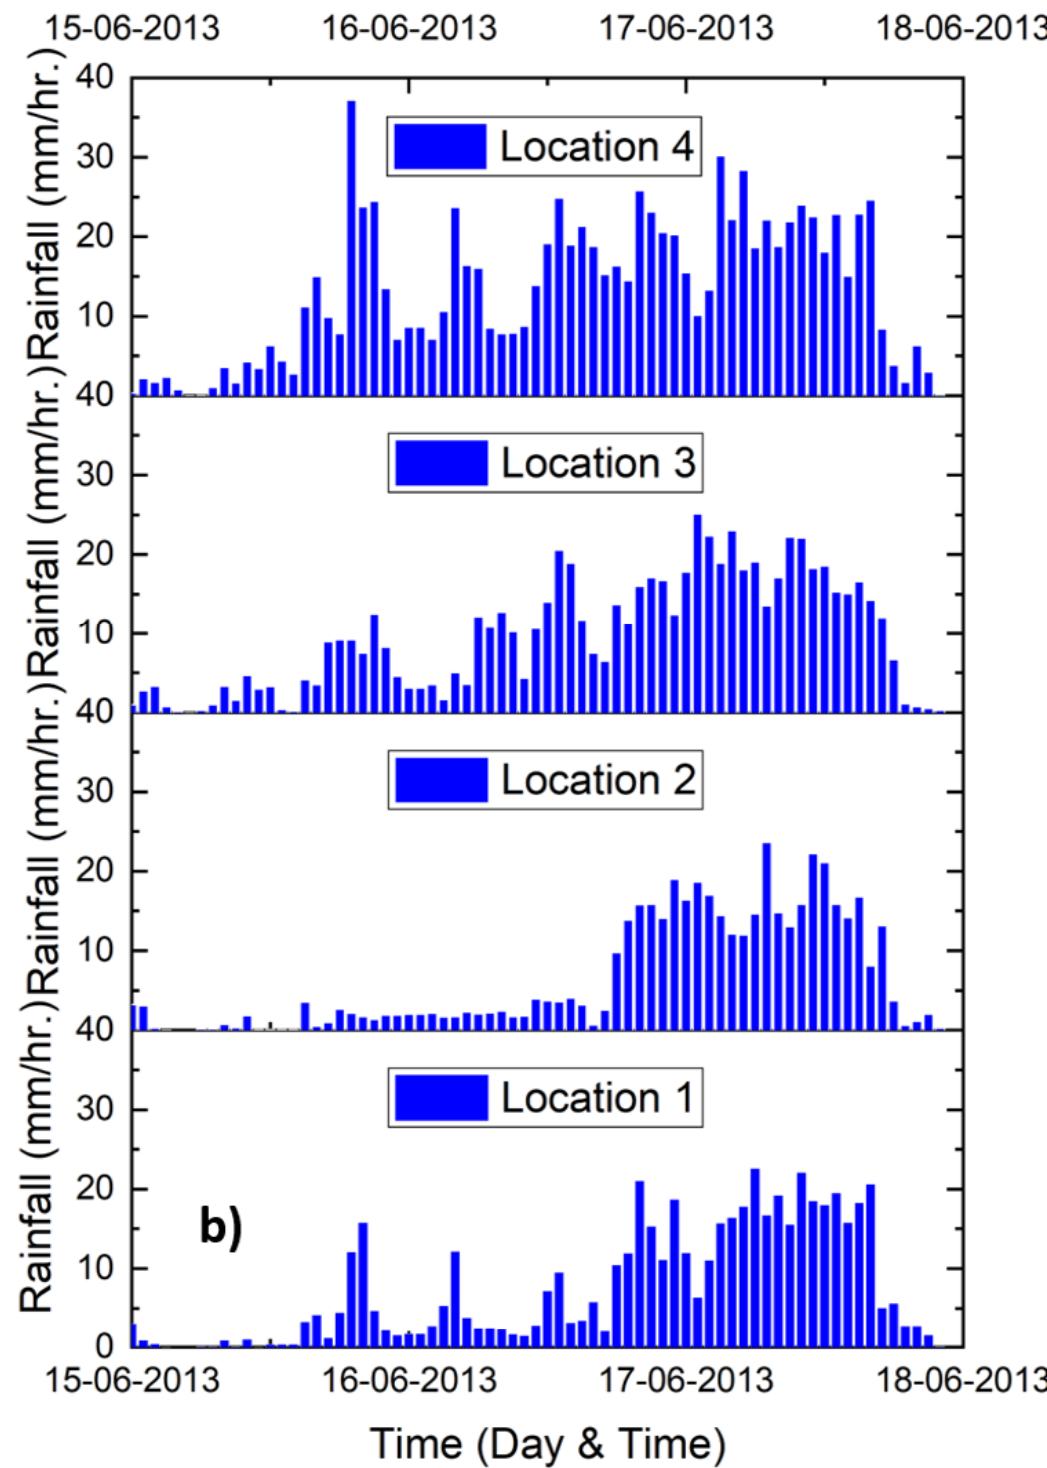

Supplement: Supplementary file 3 [file nhess-2022-297-supplement.zip]

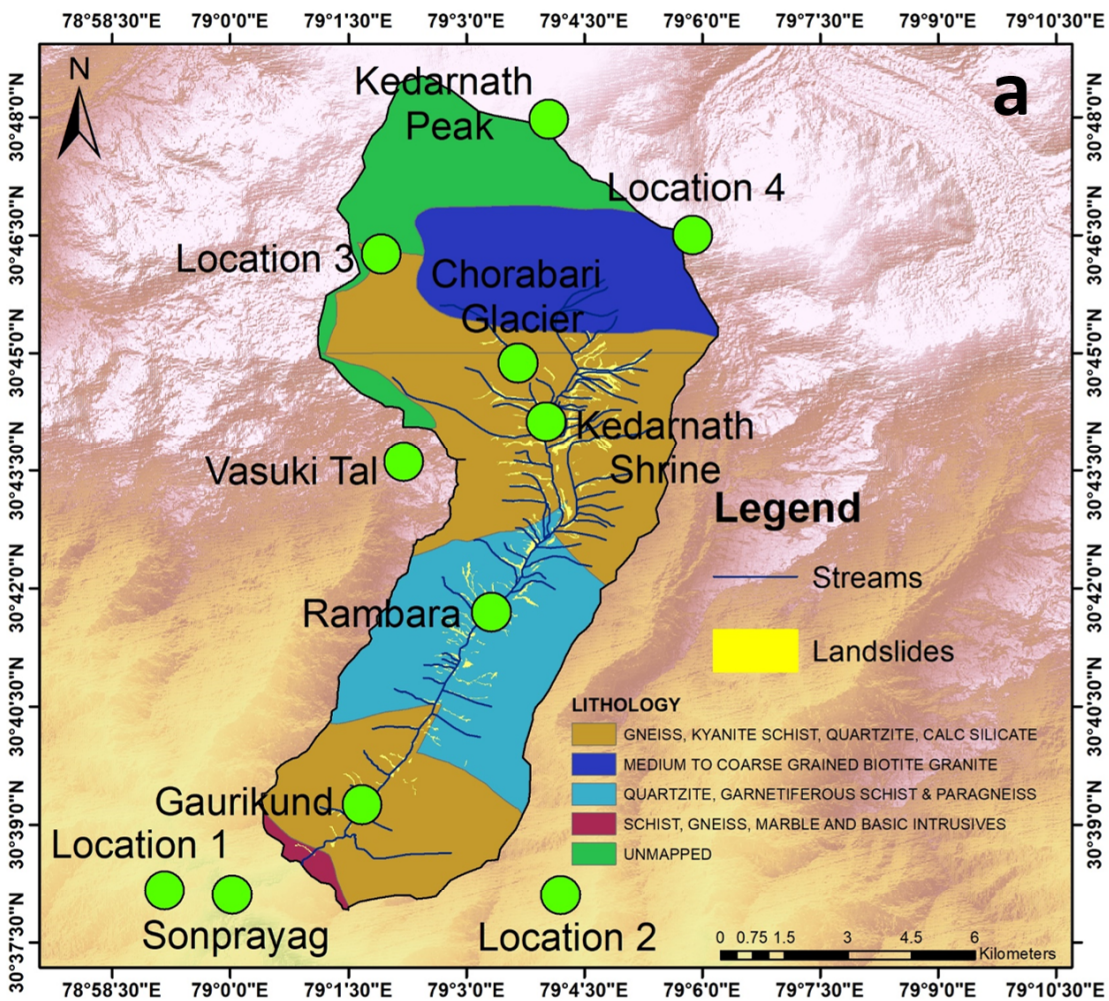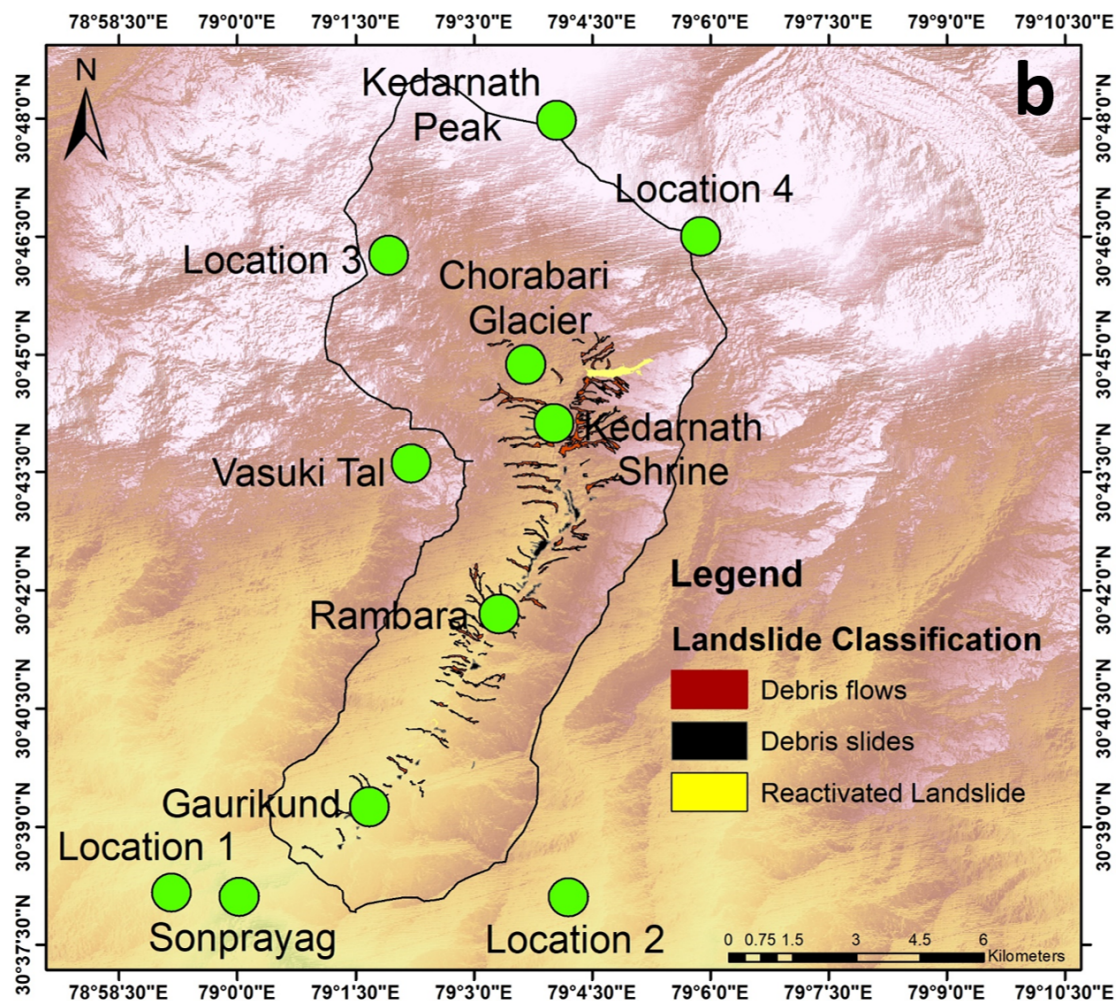

Supplement: Supplementary file 4 [file nhess-2022-297-supplement.zip]

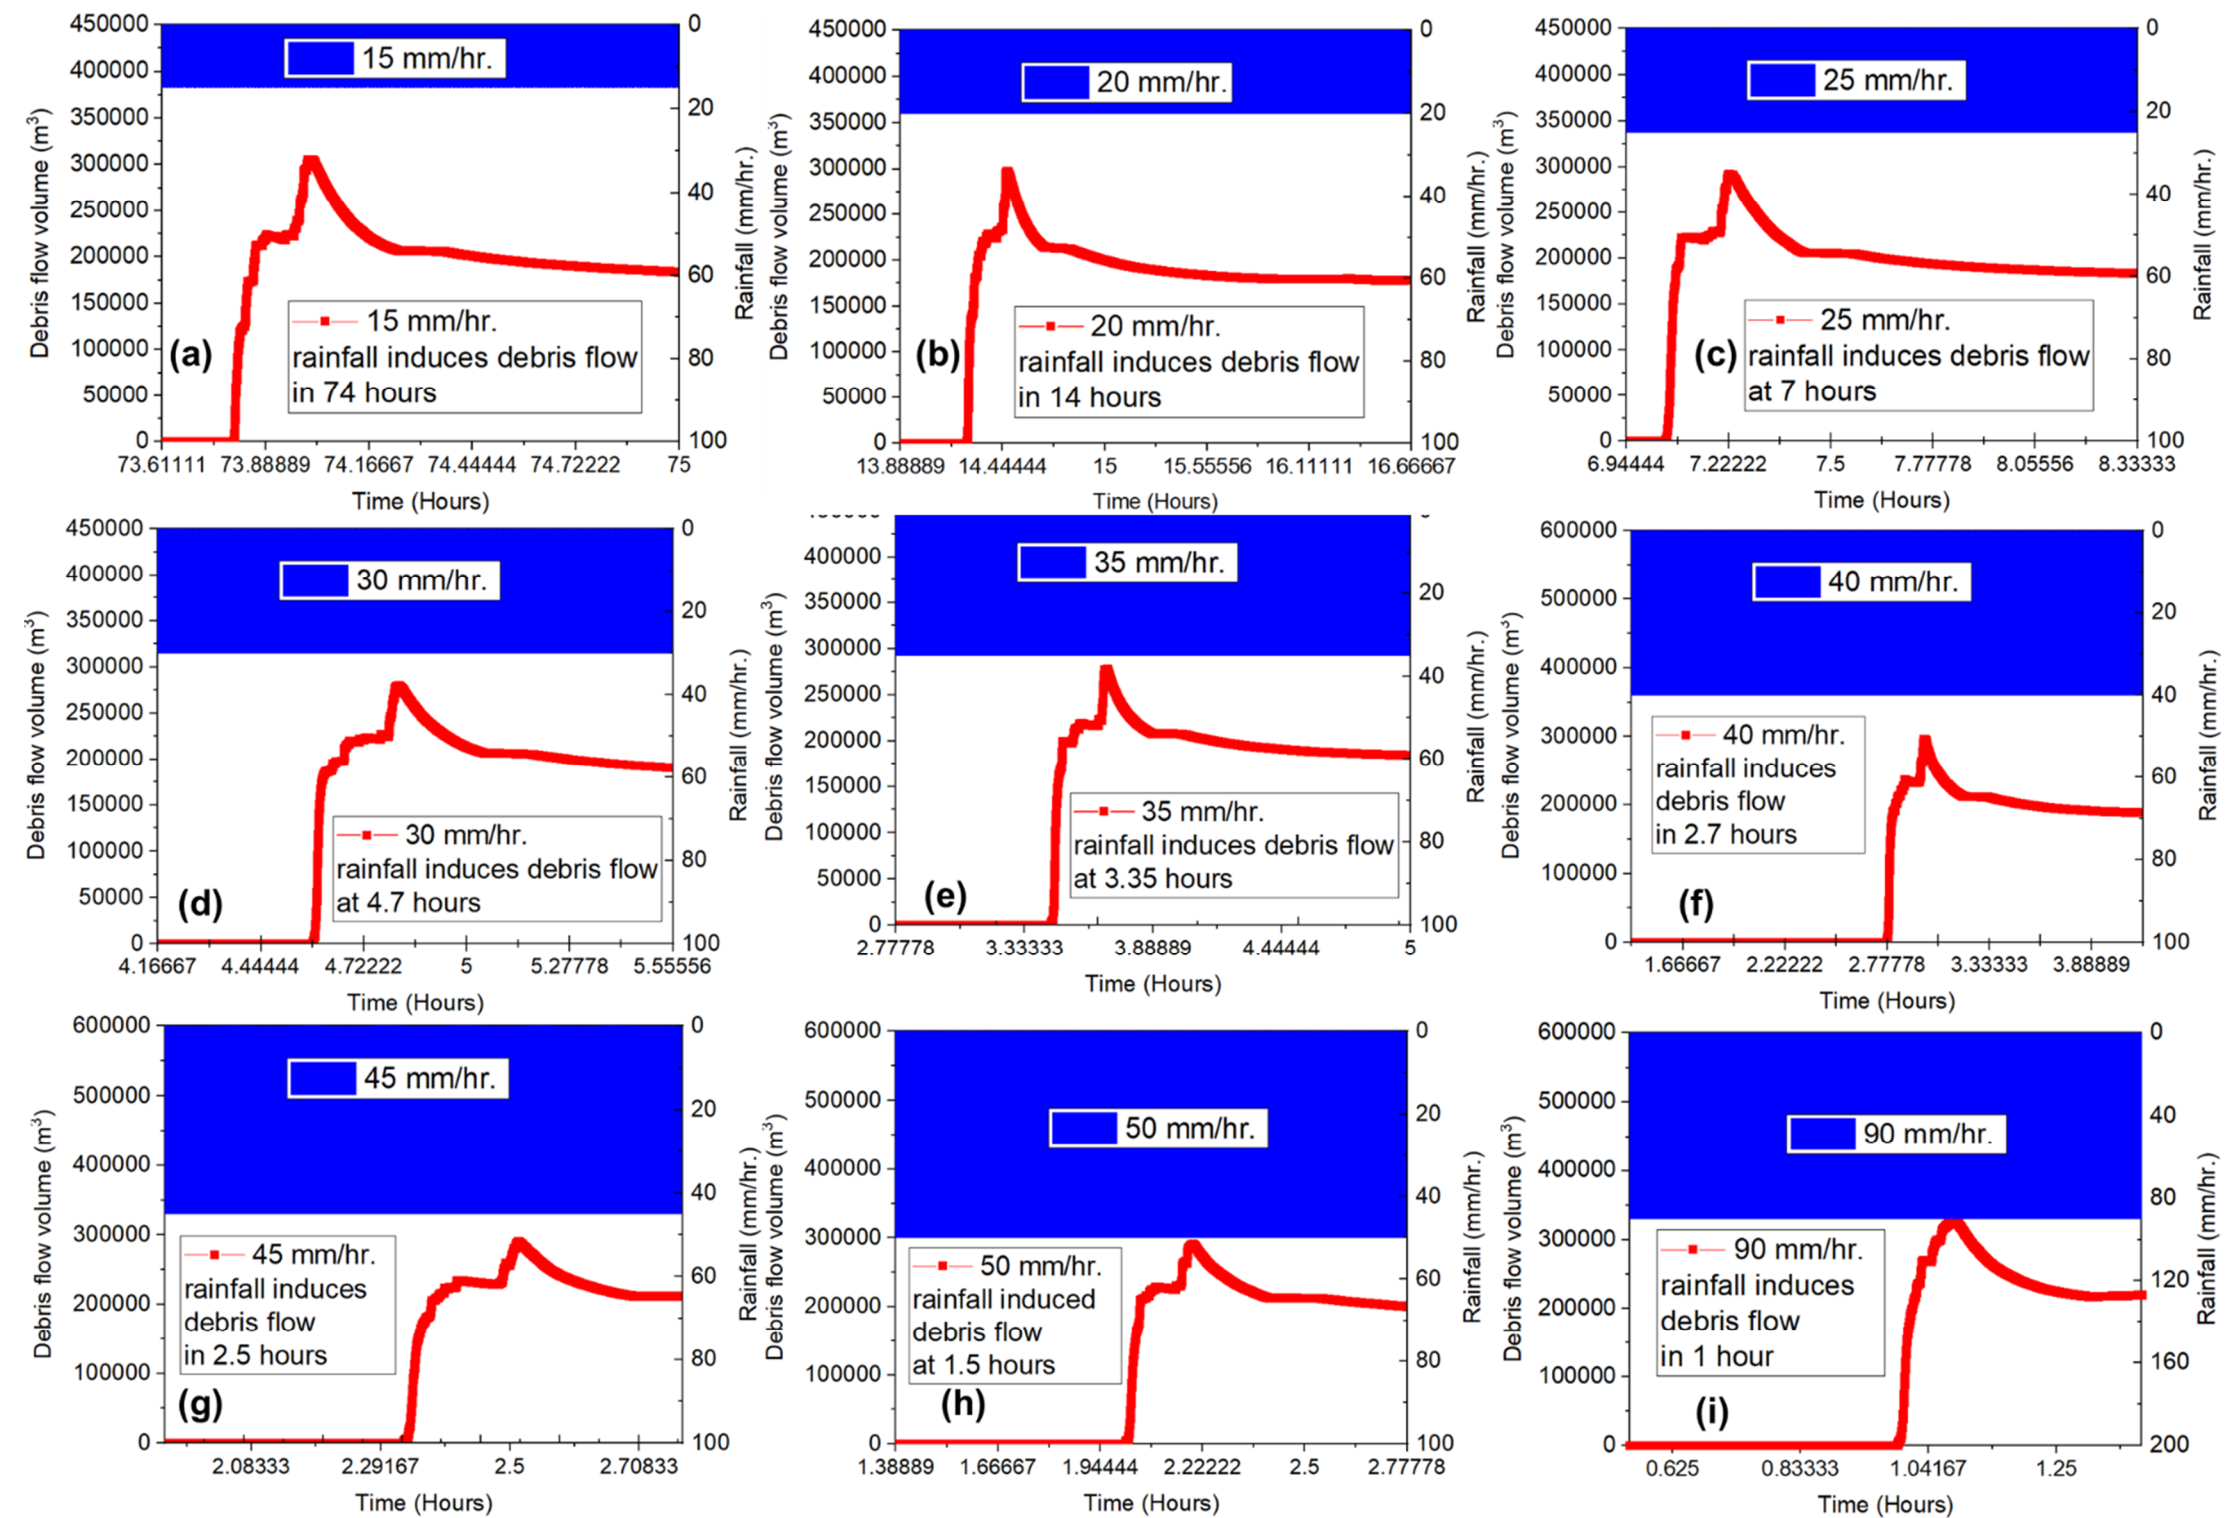

Supplement: Supplementary file 6 [file nhess-2022-297-supplement.zip]

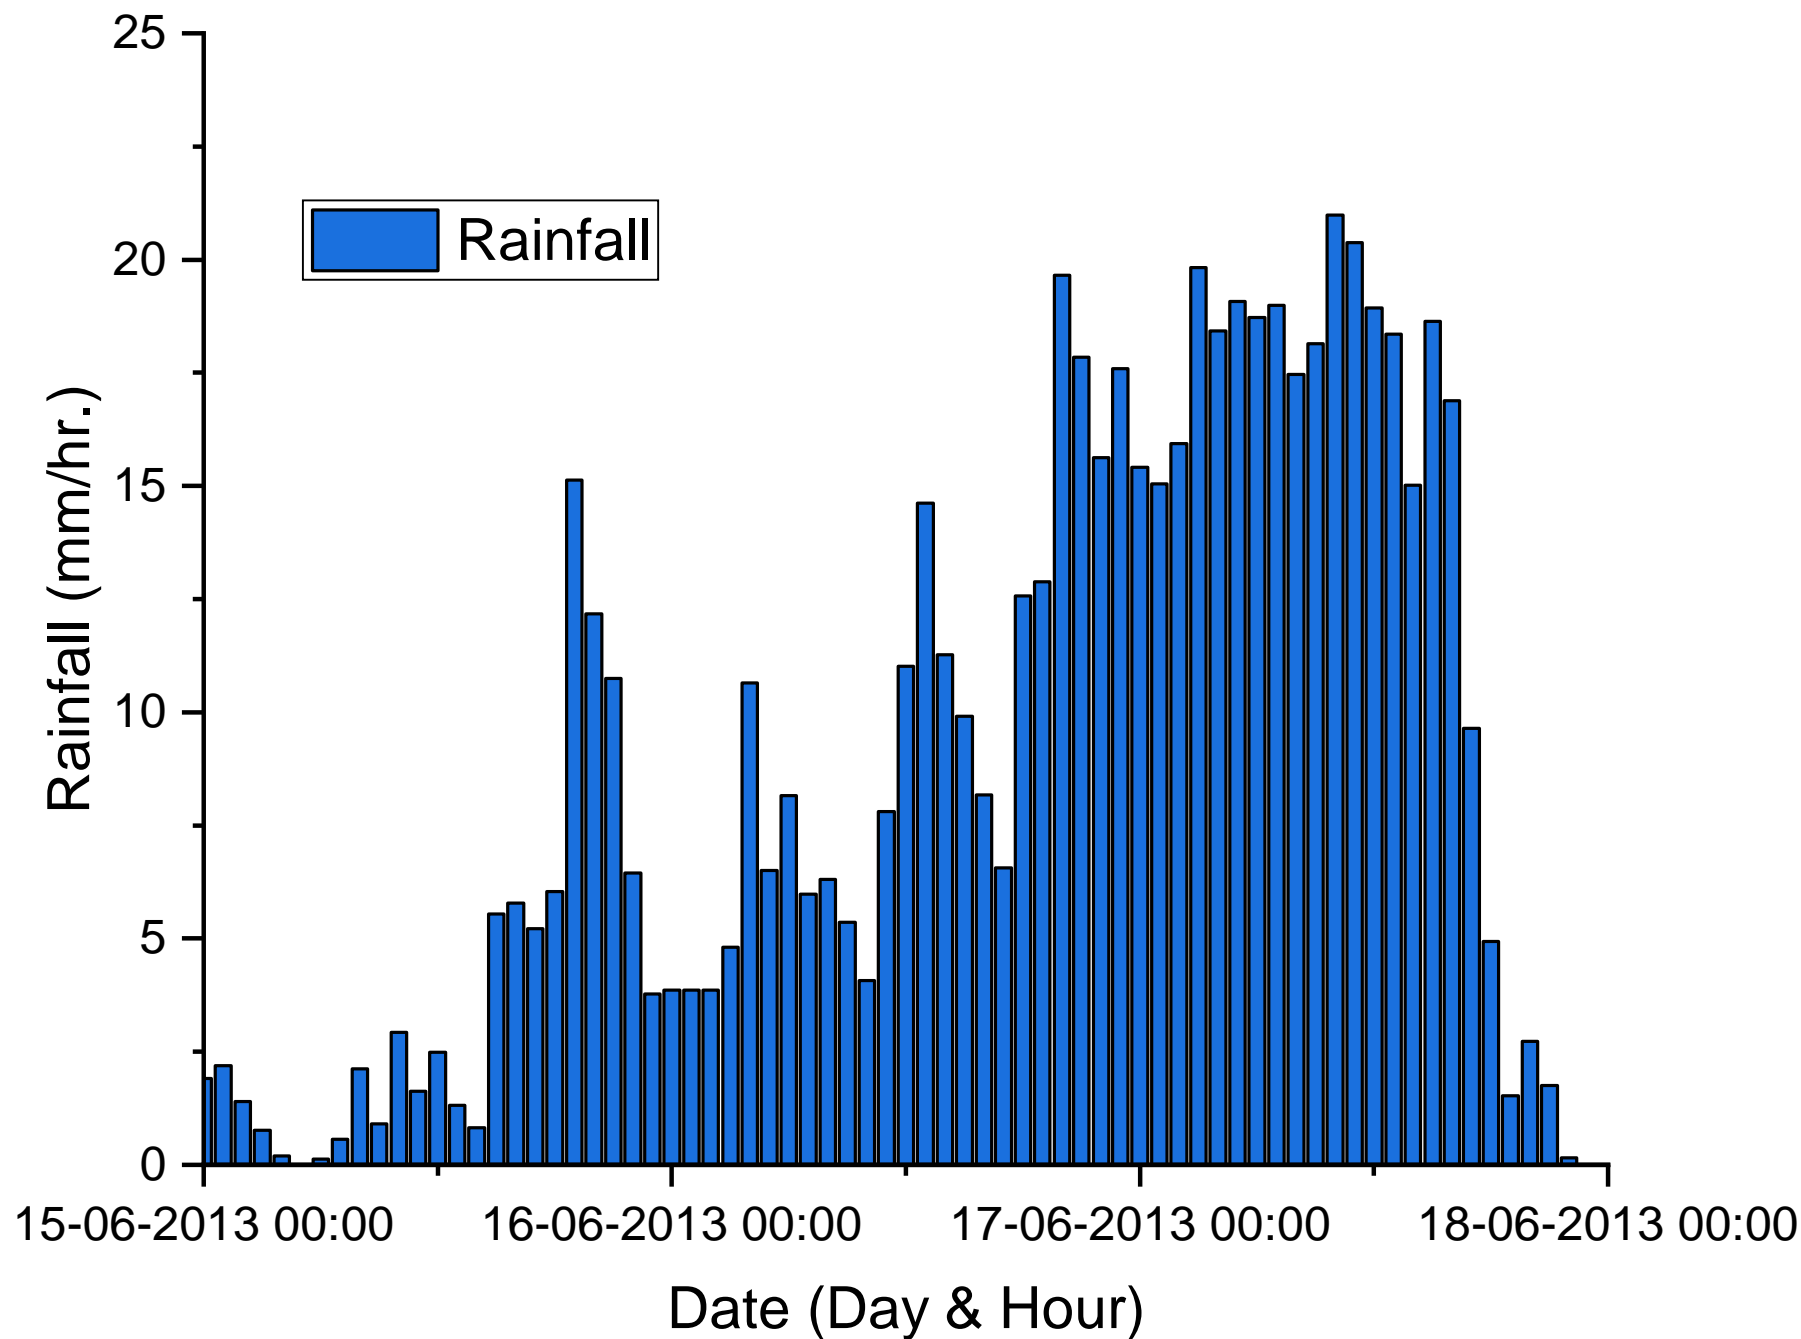

Supplement: Supplementary file 7 [file nhess-2022-297-supplement.zip]

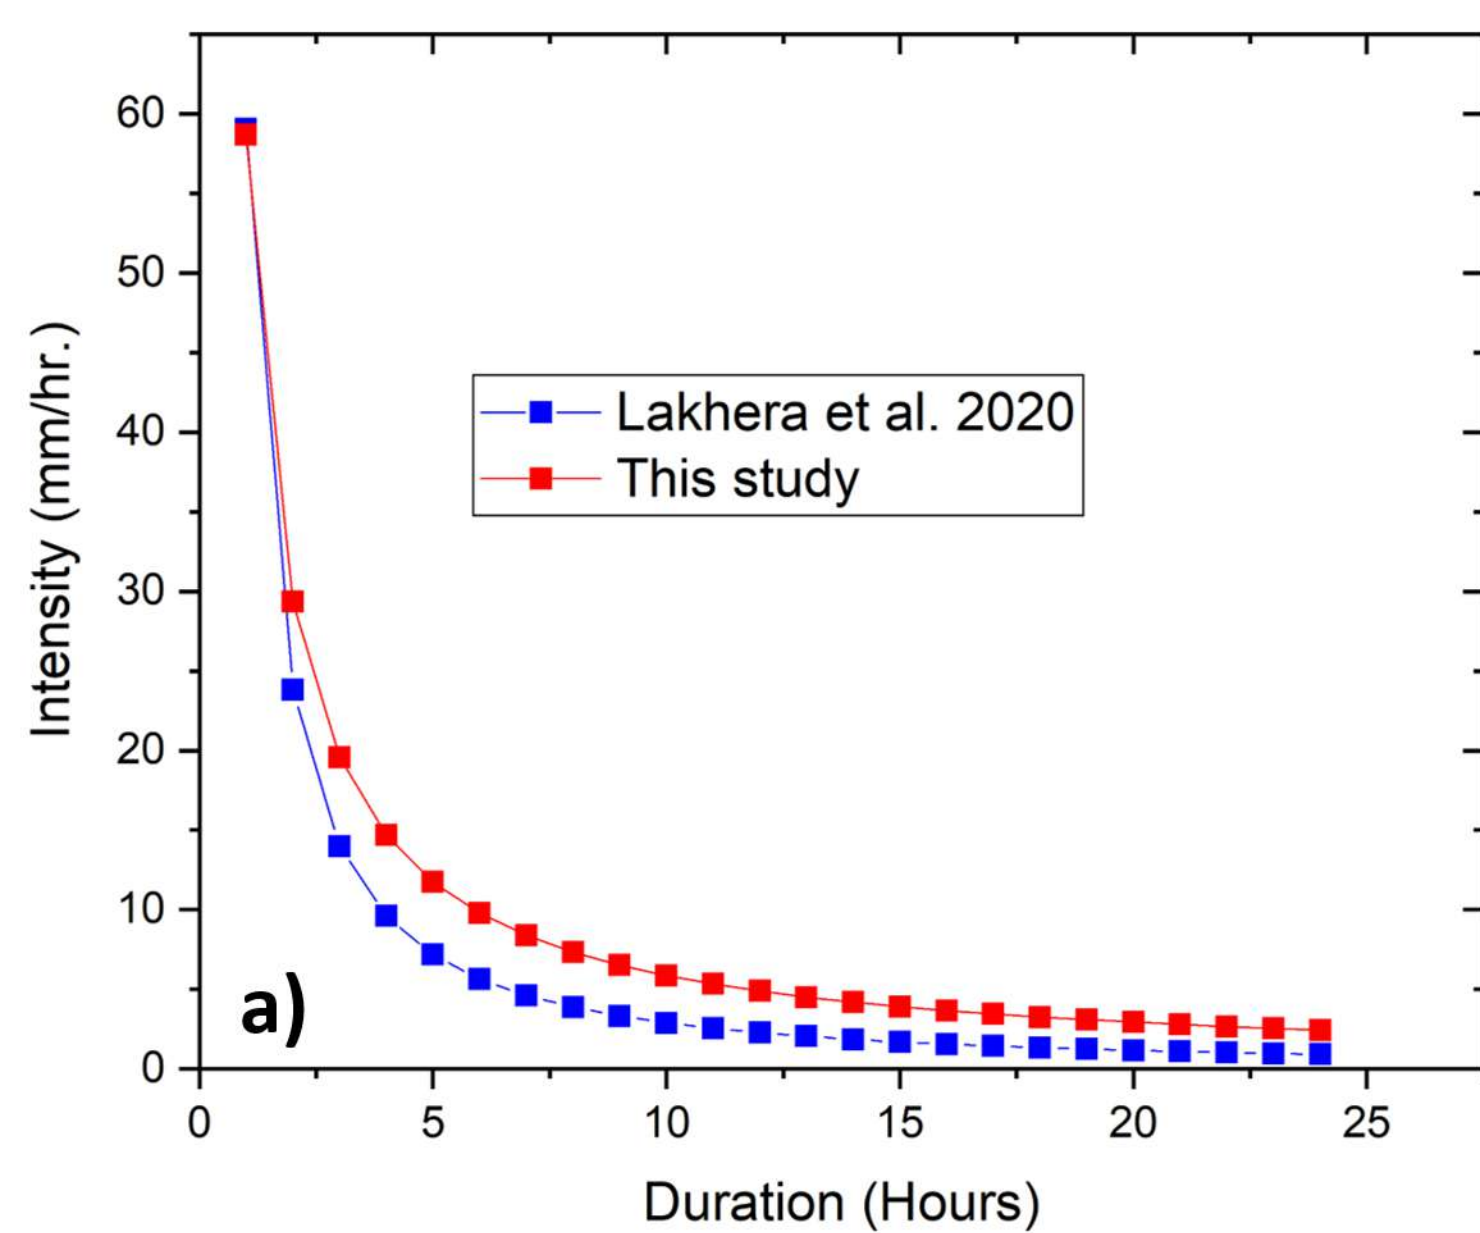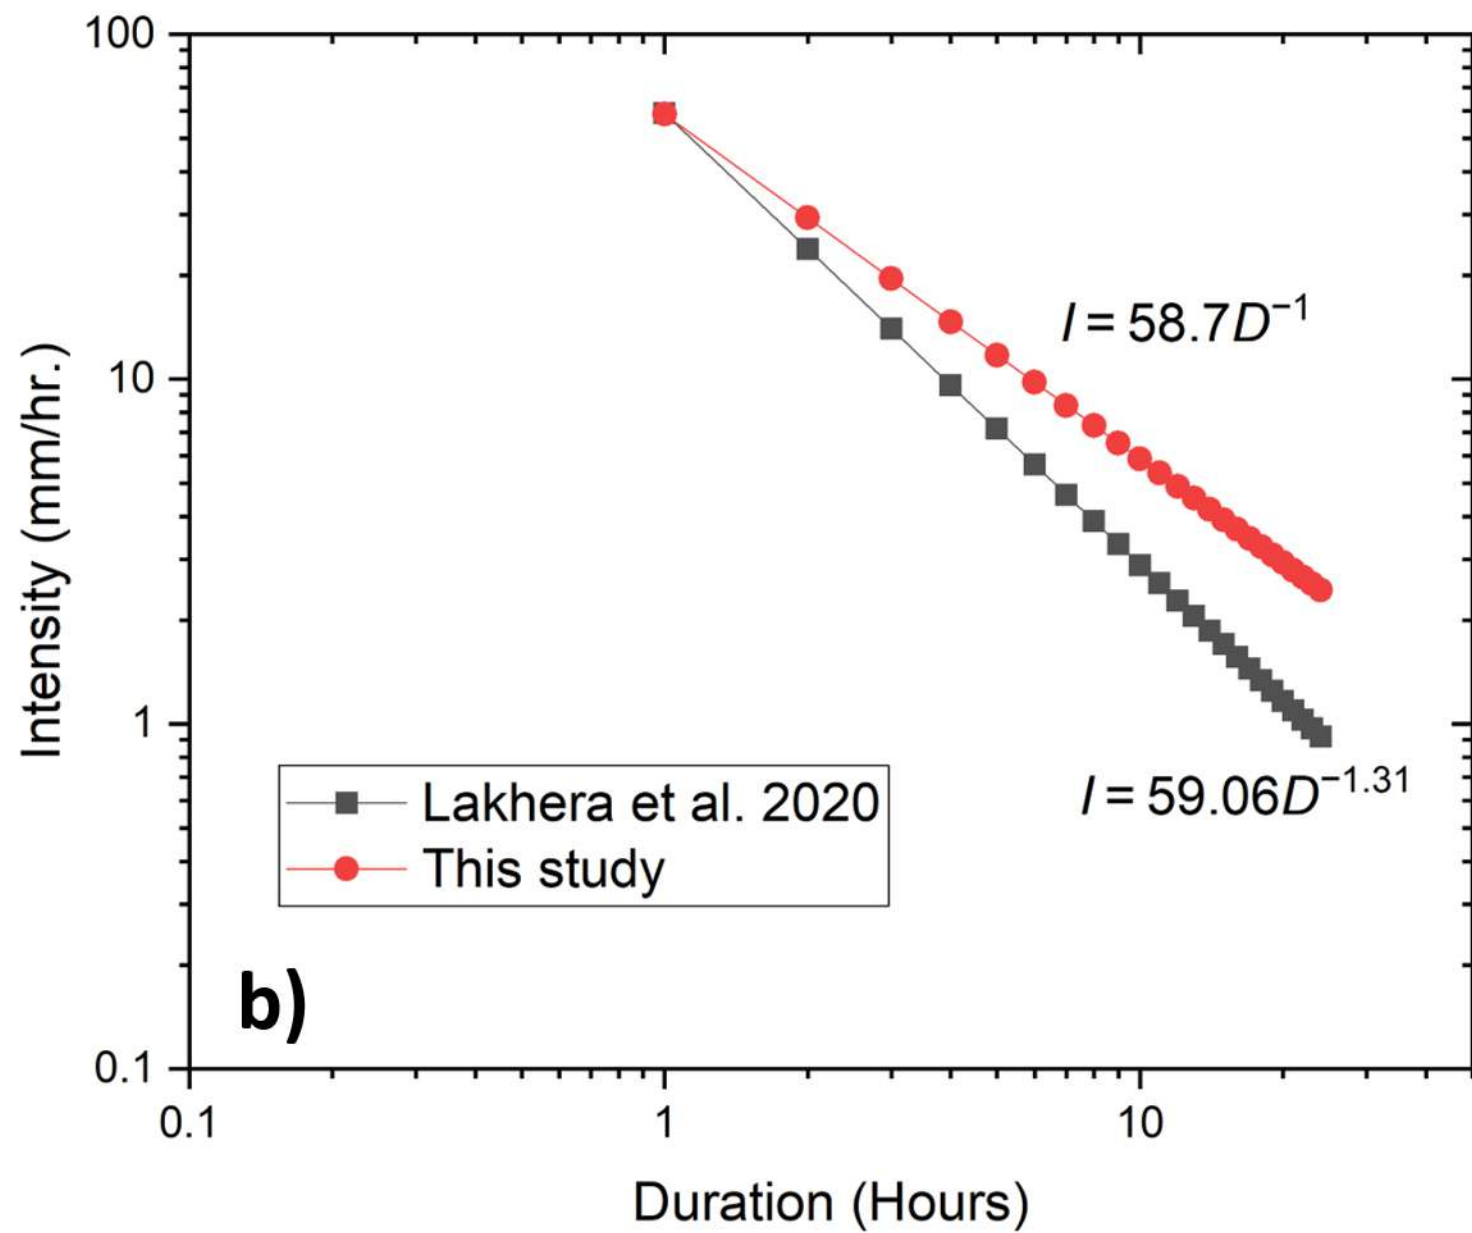

Supplement: Supplementary file 8 [file nhess-2022-297-supplement.zip]

# Framework to determine rainfall Intensity-Duration (ID) thresholds of debris flows

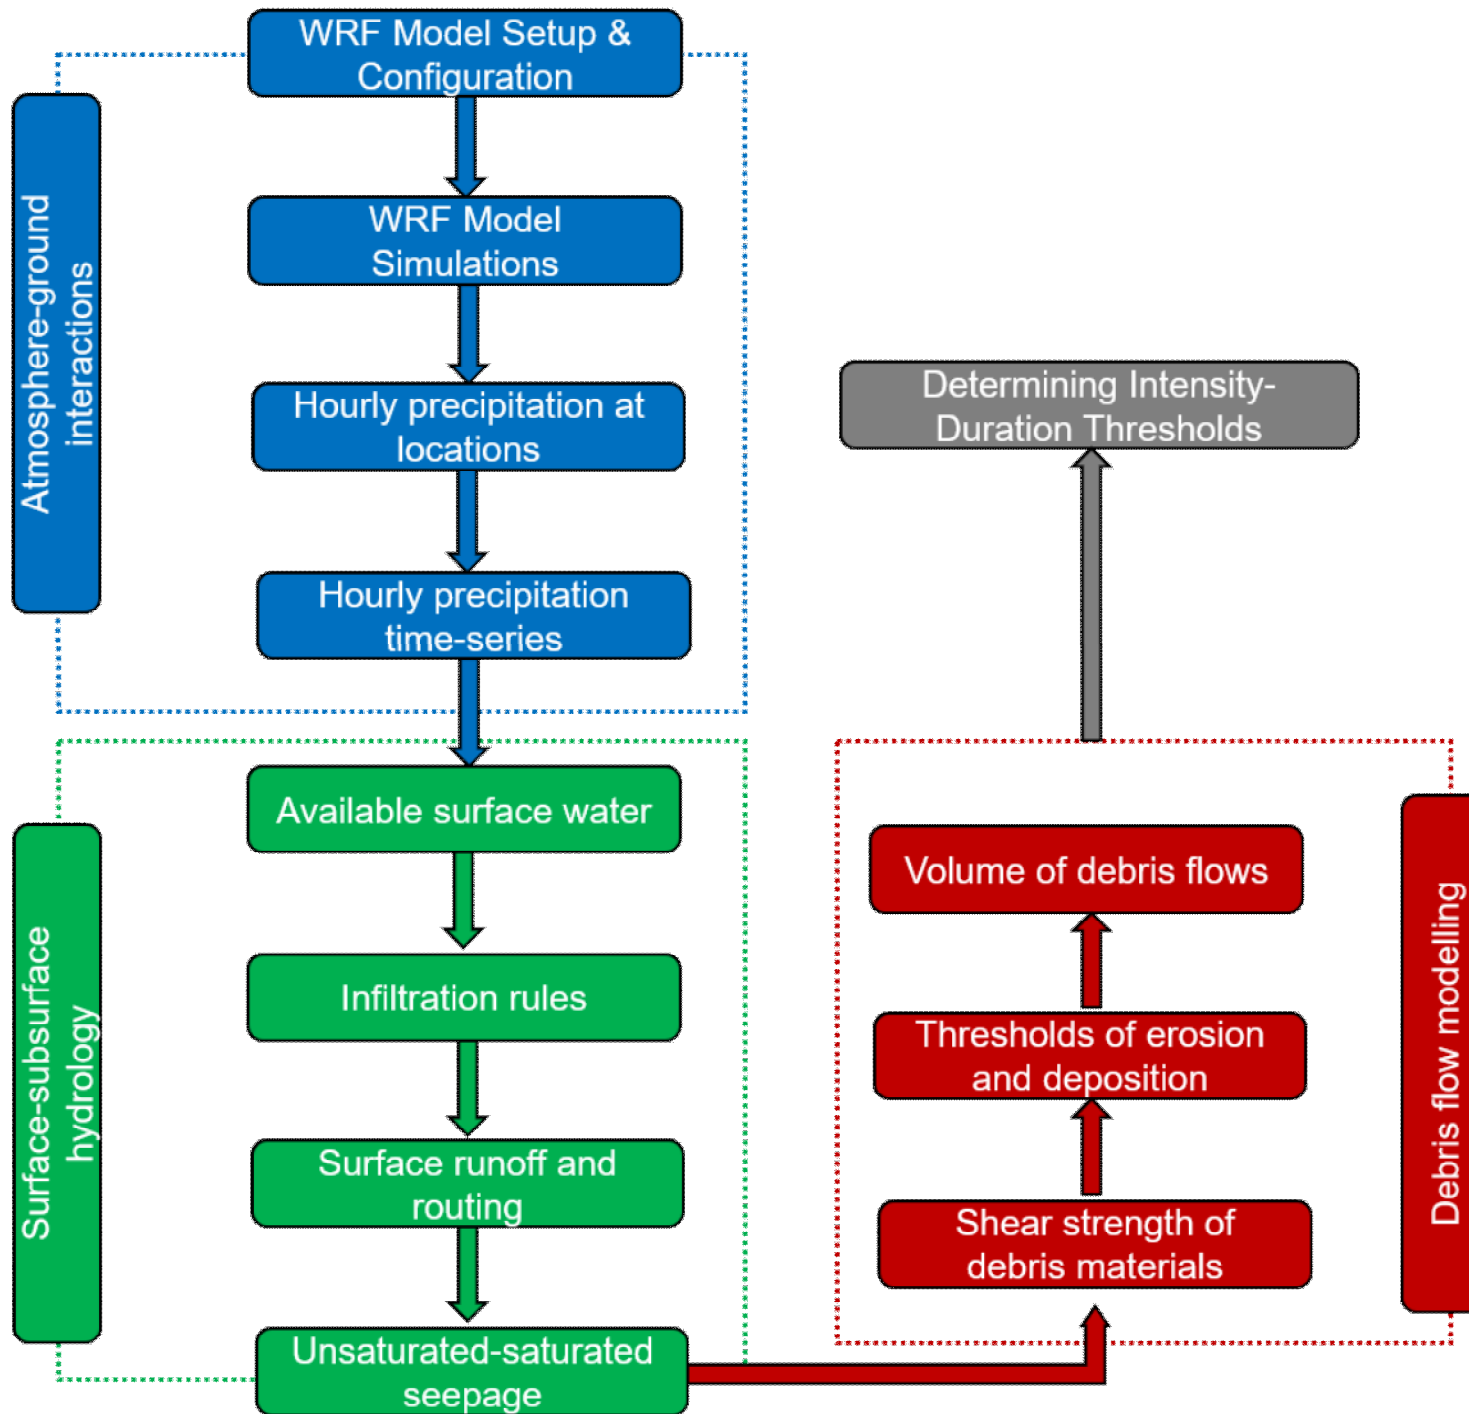

Supplement: Supplementary file 9 [file nhess-2022-297-supplement.zip]

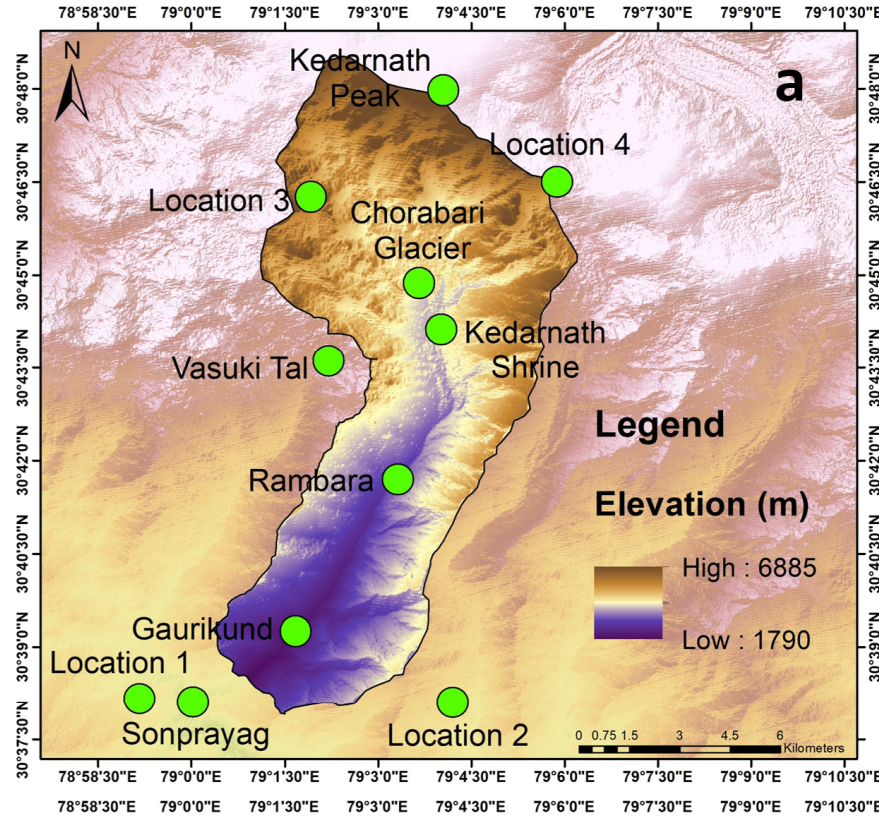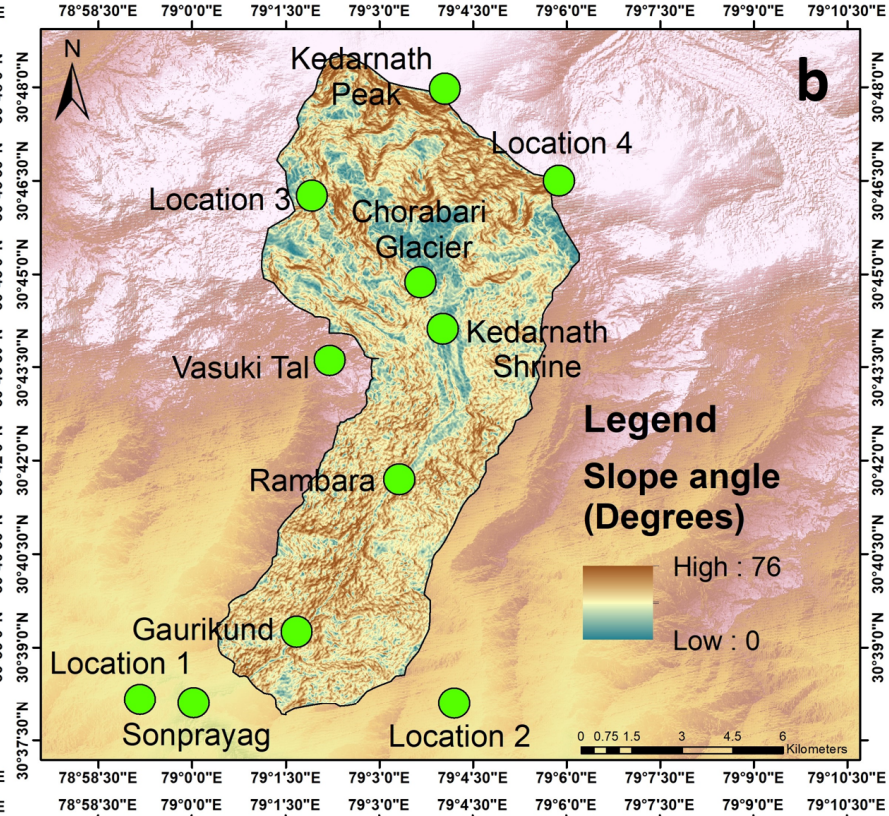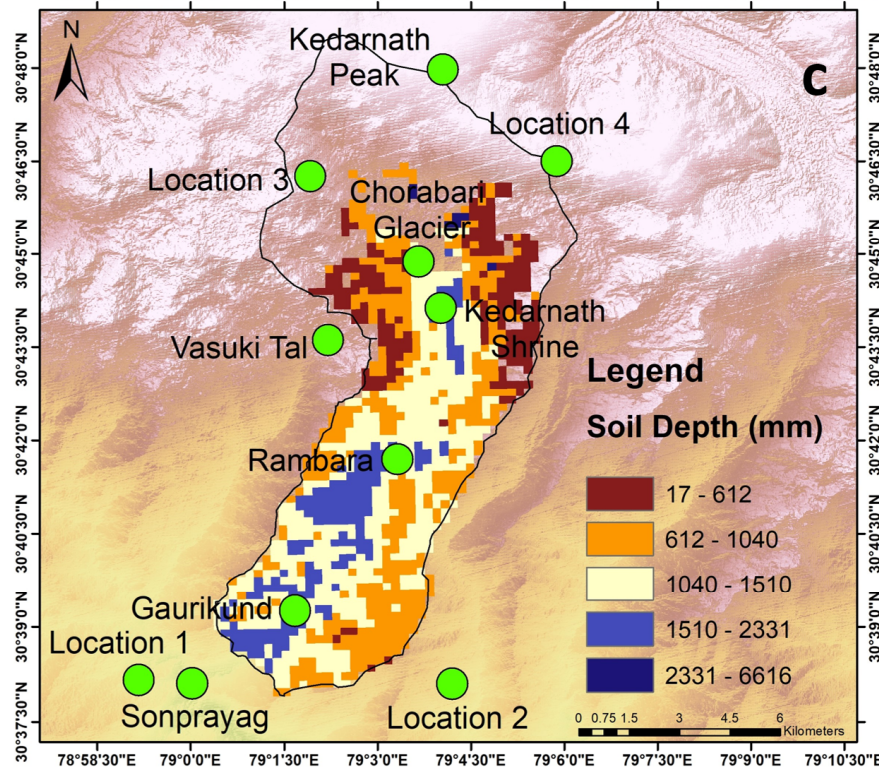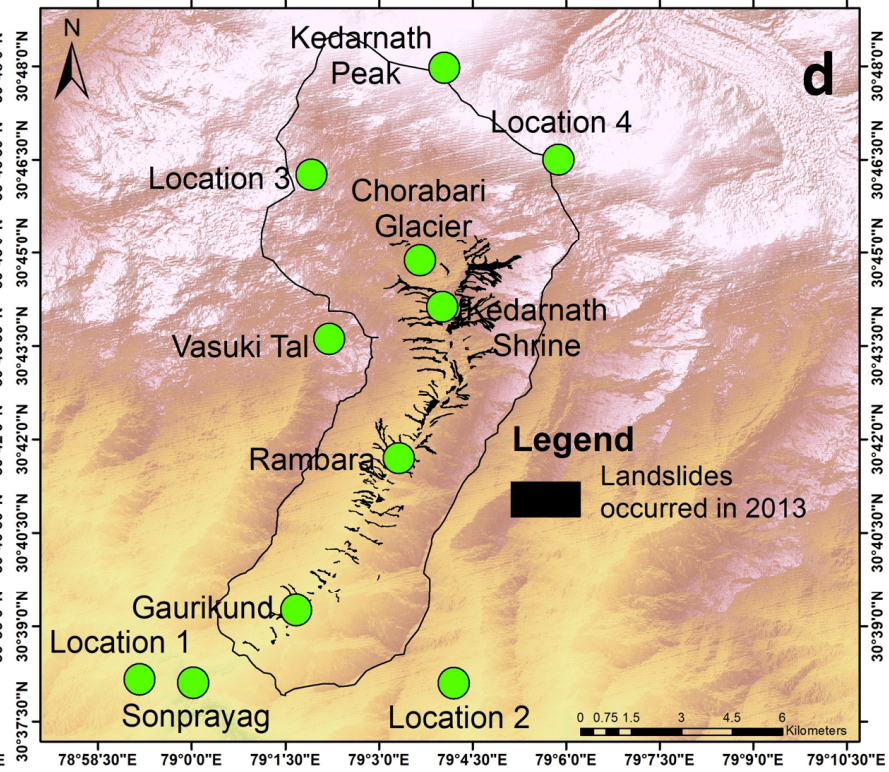

Supplement: Supplementary file 10 [file nhess-2022-297-supplement.zip]

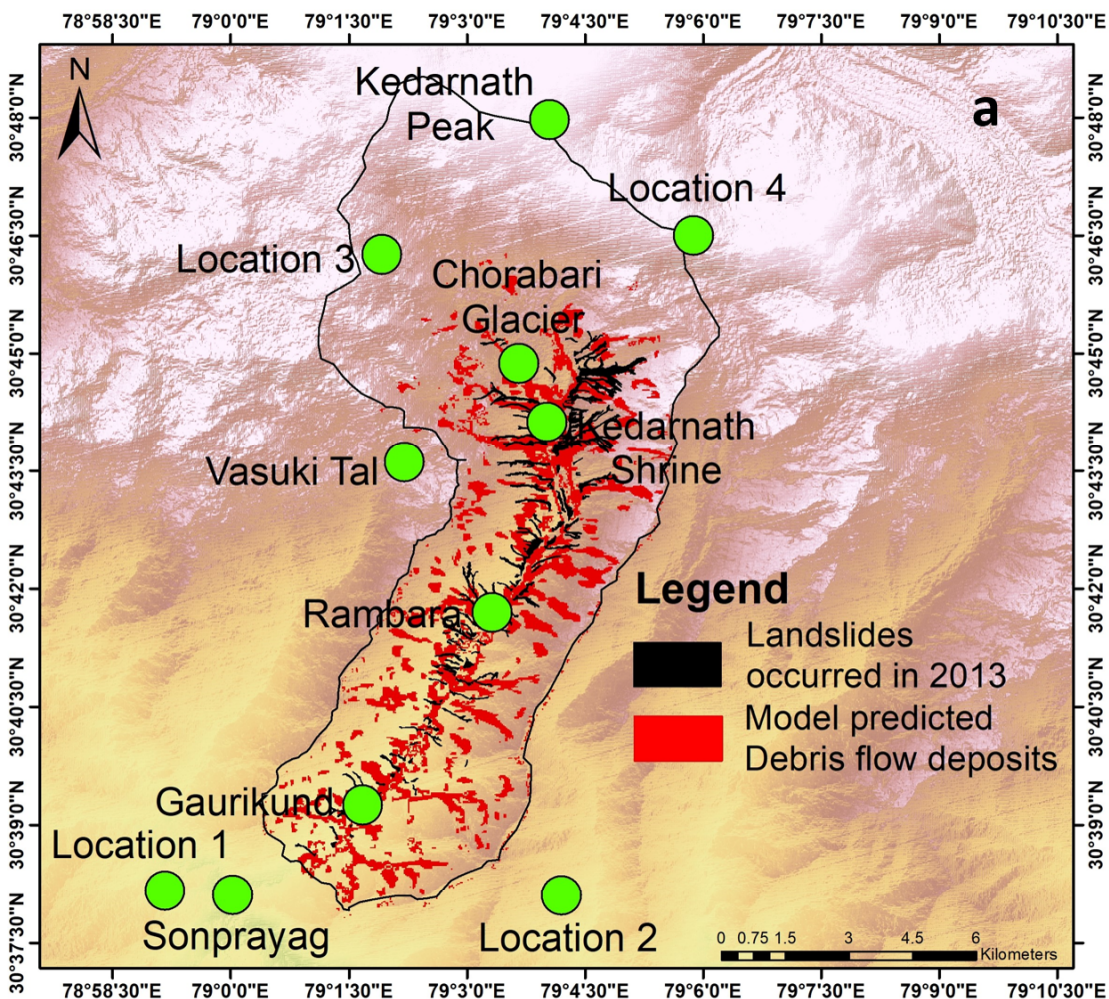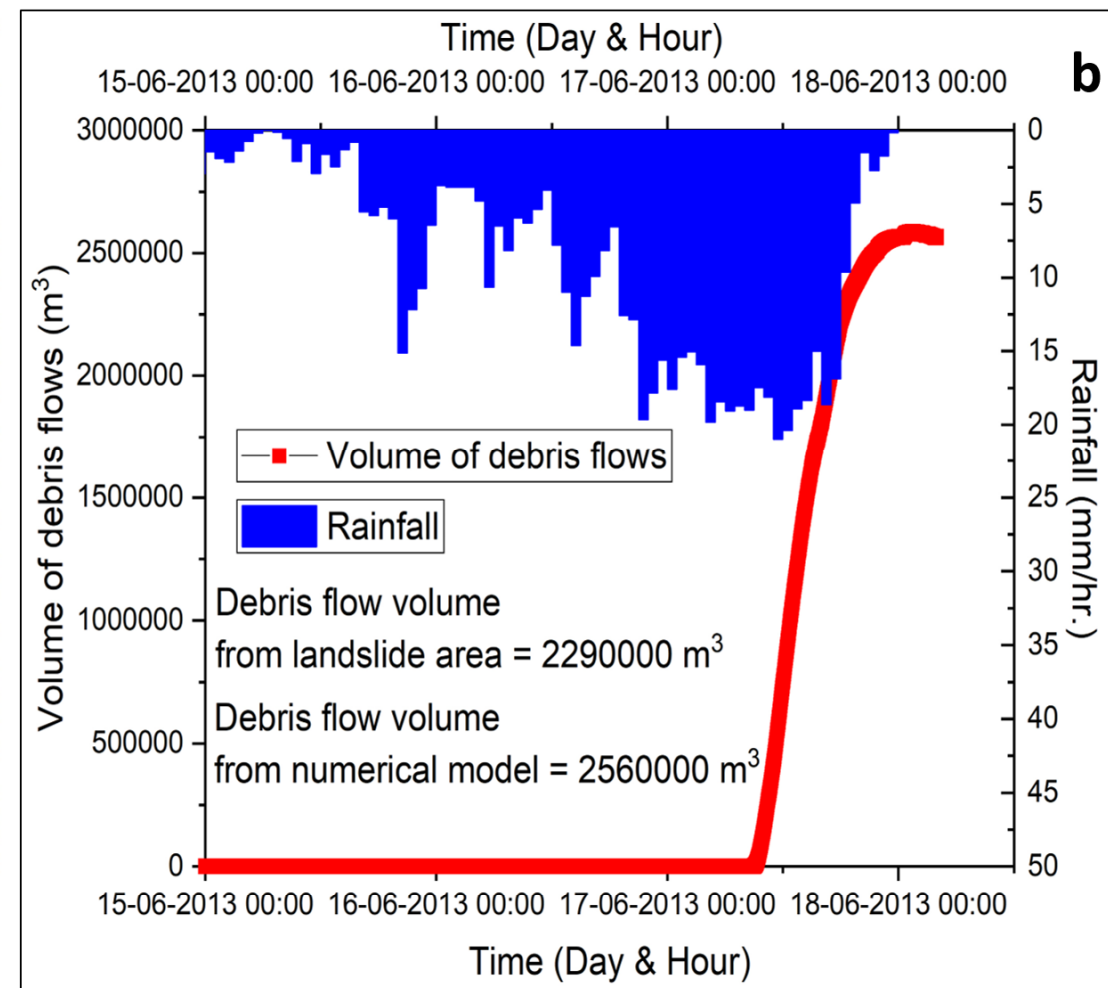

Supplement: Supplementary file 11 [file nhess-2022-297-supplement.zip]

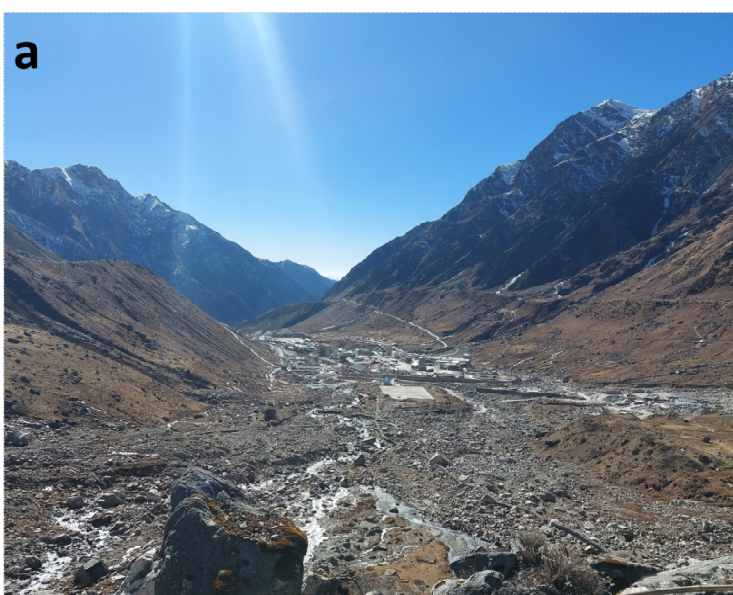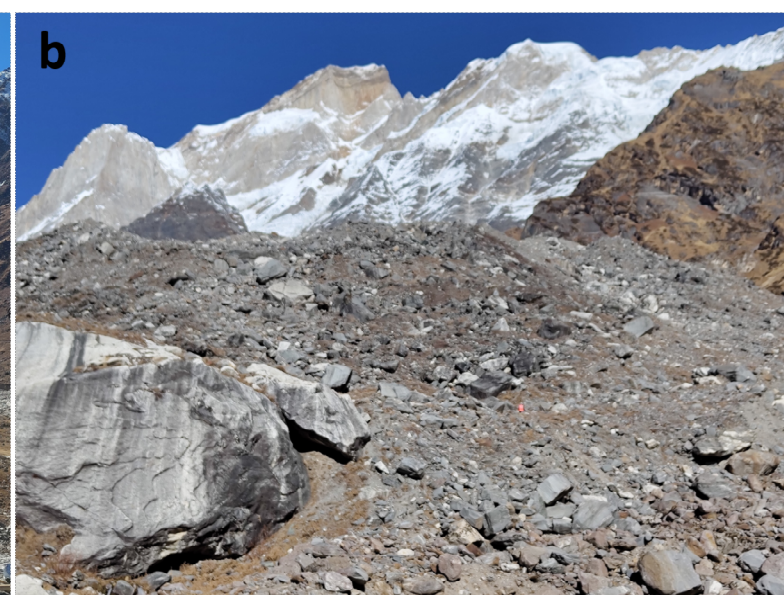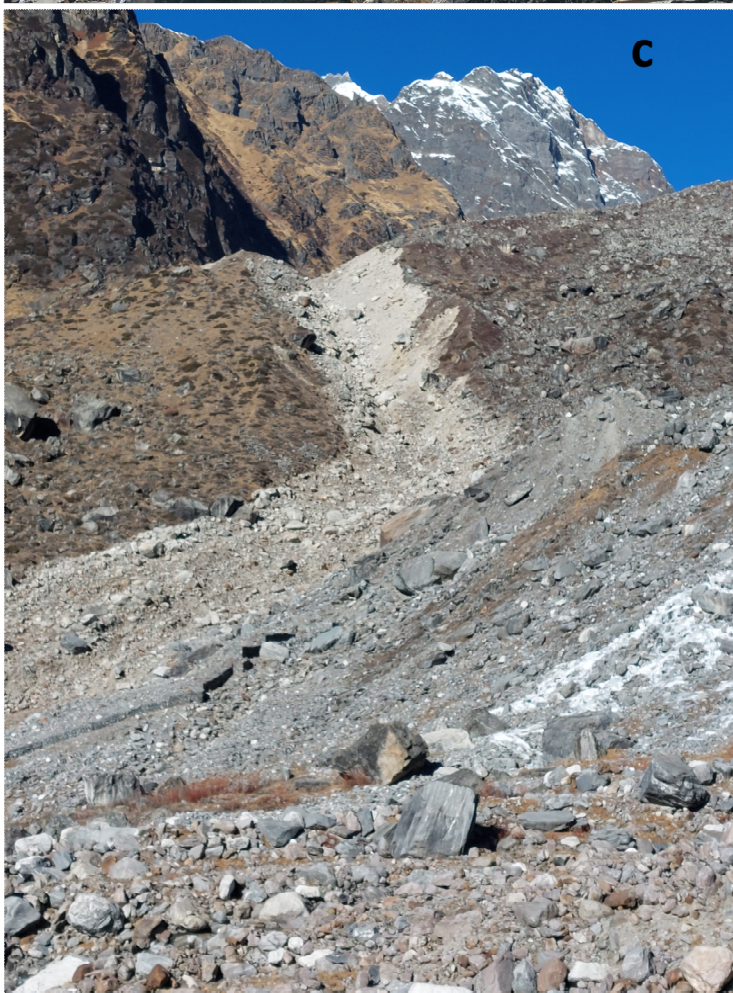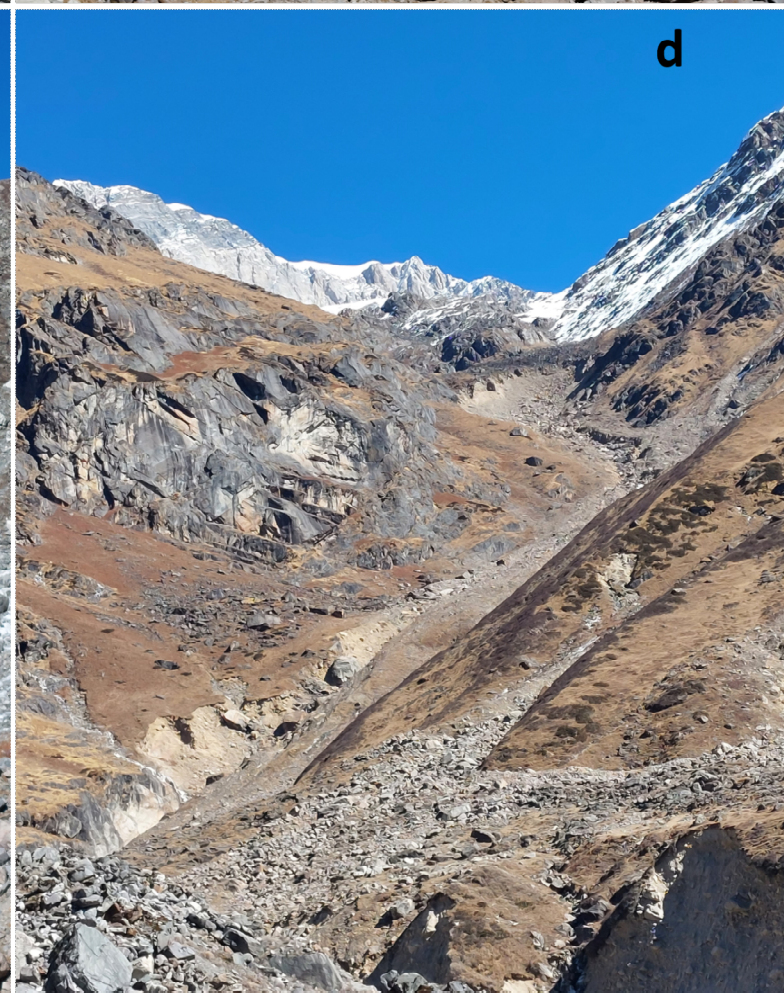

Supplement: Supplementary file 12 [file nhess-2022-297-supplement.zip]
